# Supplementary material for: Base-edited CAR T cells for combinational therapy against T cell malignancies
Source: PubMed Central journal article supplement (PMC8632682; doi:10.1038/s41375-021-01282-6), 2021-05-25
Supplement: 41375_2021_1282_MOESM1_ESM.pdf [file 41375_2021_1282_MOESM1_ESM.pdf]

# Supplementary Figure 1

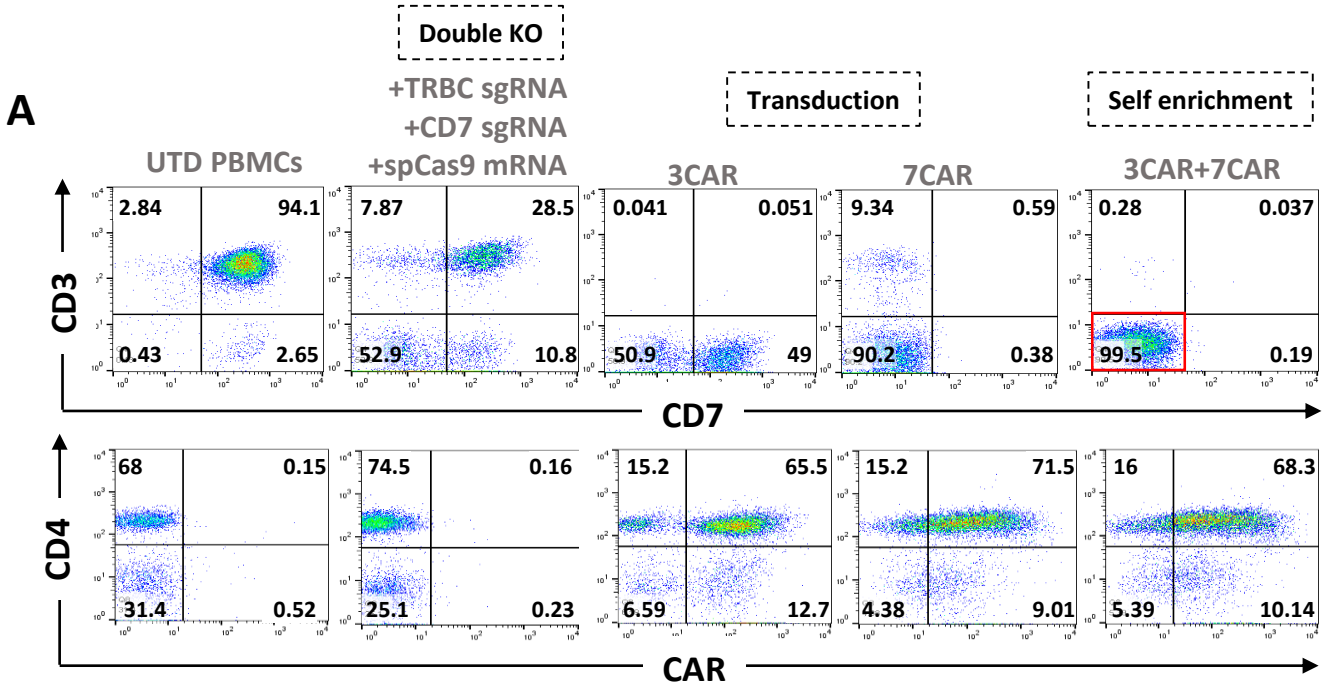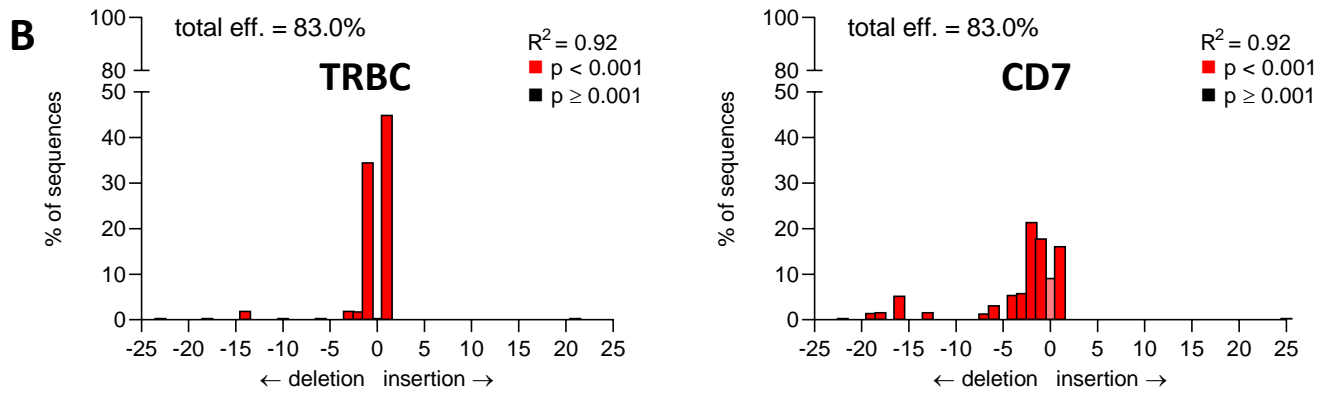

**Supplementary Figure 1. SpCas9 3CAR and 7CAR primary T cells evade fratricide during production.**

**A)** Representative phenotypic analysis of CD3 and CD7 surface antigen expression (top panel) and CAR transduction (bottom panel) of CD3/CD28 activated PBMC cells electroporated with TRBC and CD7-targeting sgRNA and SpCas9 mRNA and subsequently transduced with 3CAR or 7CAR lentiviral vectors at MOI 5. Self-enrichment effects following co-culture of 3CAR and 7CAR products results in enriched TCR<sup>+</sup>CD7<sup>-</sup> 3CAR/7CAR cells (red box). **B)** Representative TIDE output of Sanger sequencing results from mixed 3CAR/7CAR DNA PCR amplified using TRBC or CD7 forward and reverse primers. Percentage of target indels shown by red bars.

# Supplementary Figure 2

**A**

**i**

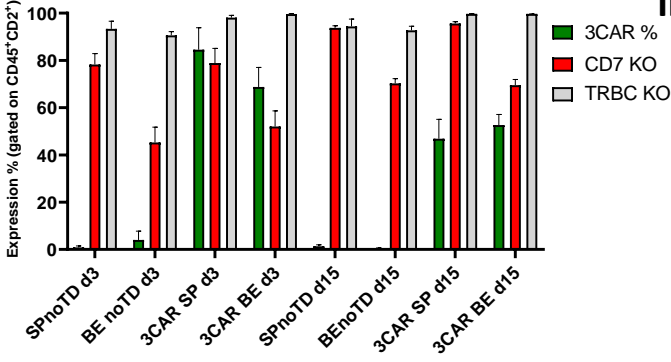

**ii**

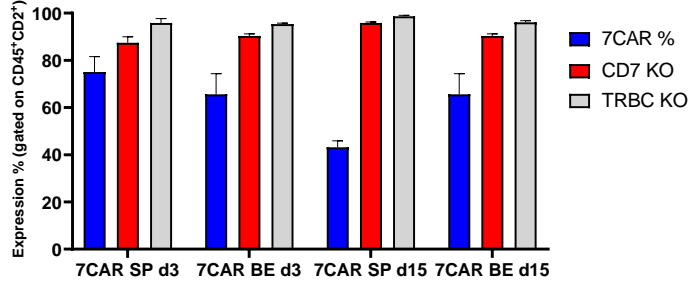

**iii**

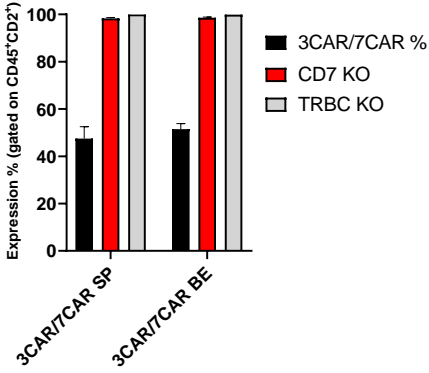

**B**

**i**

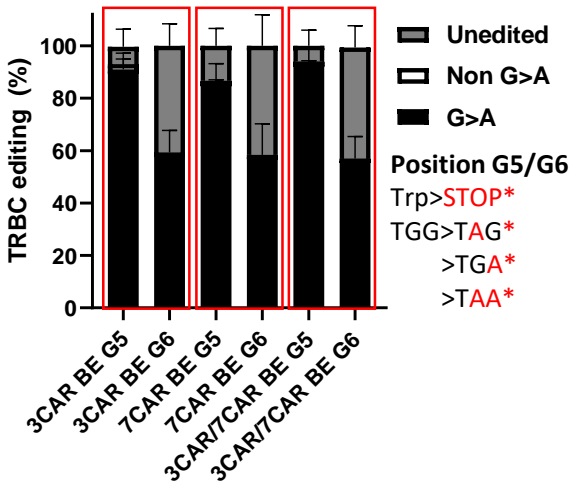

**ii**

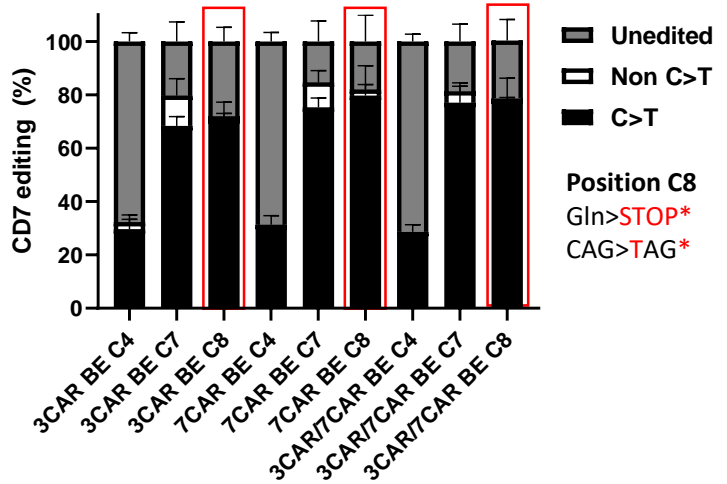

**iii**

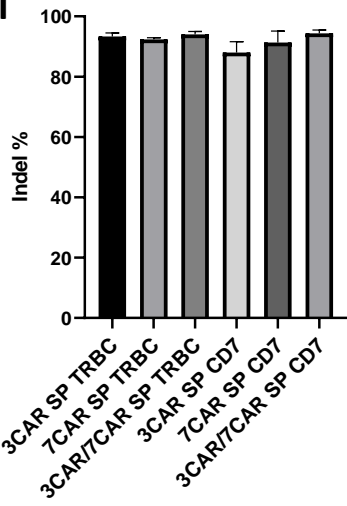

**iv**

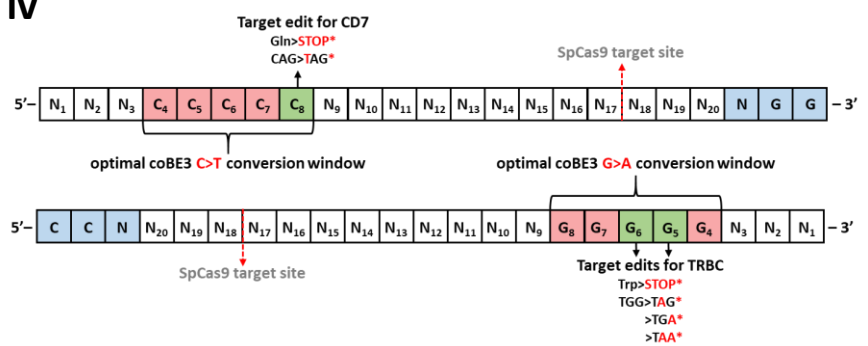

**Supplementary Figure 2. Comparison of phenotypic and molecular knockout of SpCas9 and coBE3 edited CAR T cells.**

**A)** T cells from healthy primary donors (n=3) were electroporated with either SpCas9 or coBE3 mRNA and sgRNAs targeting TRBC and CD7. Edited cells were transduced with either 3CAR **(i)**, or 7CAR **(ii)** lentiviral vectors before CAR expression and knockout were measured at early (d3) and late (d15) stage production. **(iii)** 3CAR and 7CAR effectors edited with either SpCas9 or coBE3 were co-cultured for 24 hours before undergoing similar phenotyping. **B)** DNA from these cells was extracted and the TRBC and CD7 loci were amplified by PCR for Sanger sequencing. **(i)** coBE3-mediated G>A or non G>A base conversion within the TRBC editing window, or **(ii)** C>T or non C>T base conversion within the TRBC editing window of CD7, were quantified by Editr software. **(iii)** SpCas9-mediated indels at TRBC or CD7 locus quantified by Synthego ICE analysis. Error bars represent SEM (n=3). **(iv)** Visual representation of sgRNA target sequence with rAPOBEC1 editing window highlighted. Target bases leading to premature STOP following coBE3-mediated editing highlighted in green. SpCas9 cleavage position marked by red arrow.

# Supplementary Figure 3

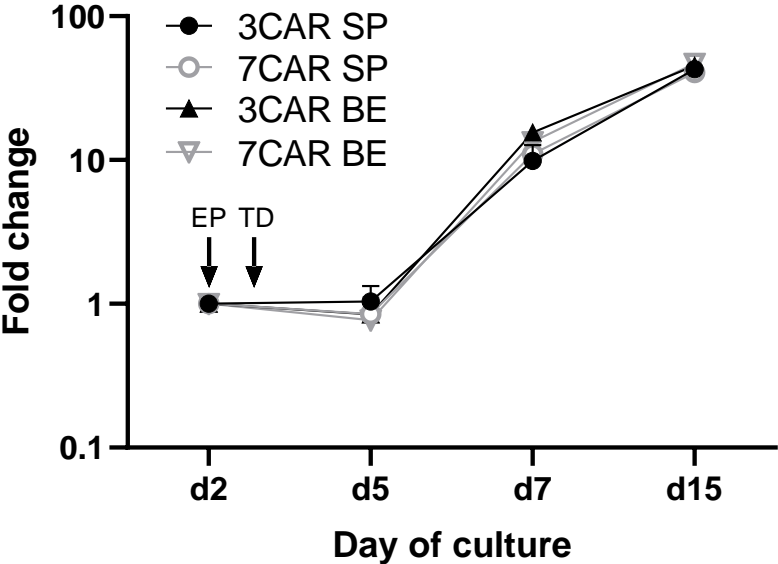

**Supplementary Figure 3. coBE3-mediated removal of shared antigens on 3CAR and 7CAR T cells has no impact on cell expansion.**

An equal starting number of cells from primary T cell donors (n=3) were activated on day 0 and then electroporated (EP) with either SpCas9 or coBE3 mRNA and sgRNAs targeting TRBC and CD7 on day 2 (d2). 24 hours later, cells were transduced (TD) with either 3CAR or 7CAR and cultured in G-Rex 24-well chambers. Cells were harvested and counted on days 5, 7 and 15 and fold expansion was measured and plotted. Error bars represent SEM across n=3 donors.



**Supplementary Figure 4. Phenotype of 3CAR and 7CAR T cells with SpCas9 or coBE3 edits.**

**A)** T cells from healthy primary donors (n=3) were electroporated with either SpCas9 or coBE3 mRNA and sgRNAs targeting TRBC and CD7. Edited cells were transduced with either 3CAR or 7CAR lentiviral vectors and cultured in G-Rex 24-well chambers prior to phenotyping. Representative flow cytometry plots from n=1 donor gated for CD45<sup>+</sup>CD2<sup>+</sup>CD4<sup>+</sup> (left) or CD45<sup>+</sup>CD2<sup>+</sup>CD8<sup>+</sup> (left) stained for CD62L and CD45RA allows for discrimination of CD62L<sup>+</sup>CD45RA<sup>+</sup> naïve (TN), CD62L<sup>+</sup>CD45RA<sup>-</sup> central memory (TCM), CD62L<sup>-</sup>CD45RA<sup>-</sup> effector memory (TEM) or CD62L<sup>-</sup>CD45RA<sup>+</sup> effector memory CD45RA<sup>+</sup> T cells (TEMRA). **B)** Differentiation status of T cells from primary donors (n=3) individually depicted as open circles, squares or triangles, according to CD4, CD8, CD62L and CD45RA expression.



# Supplementary Figure 5

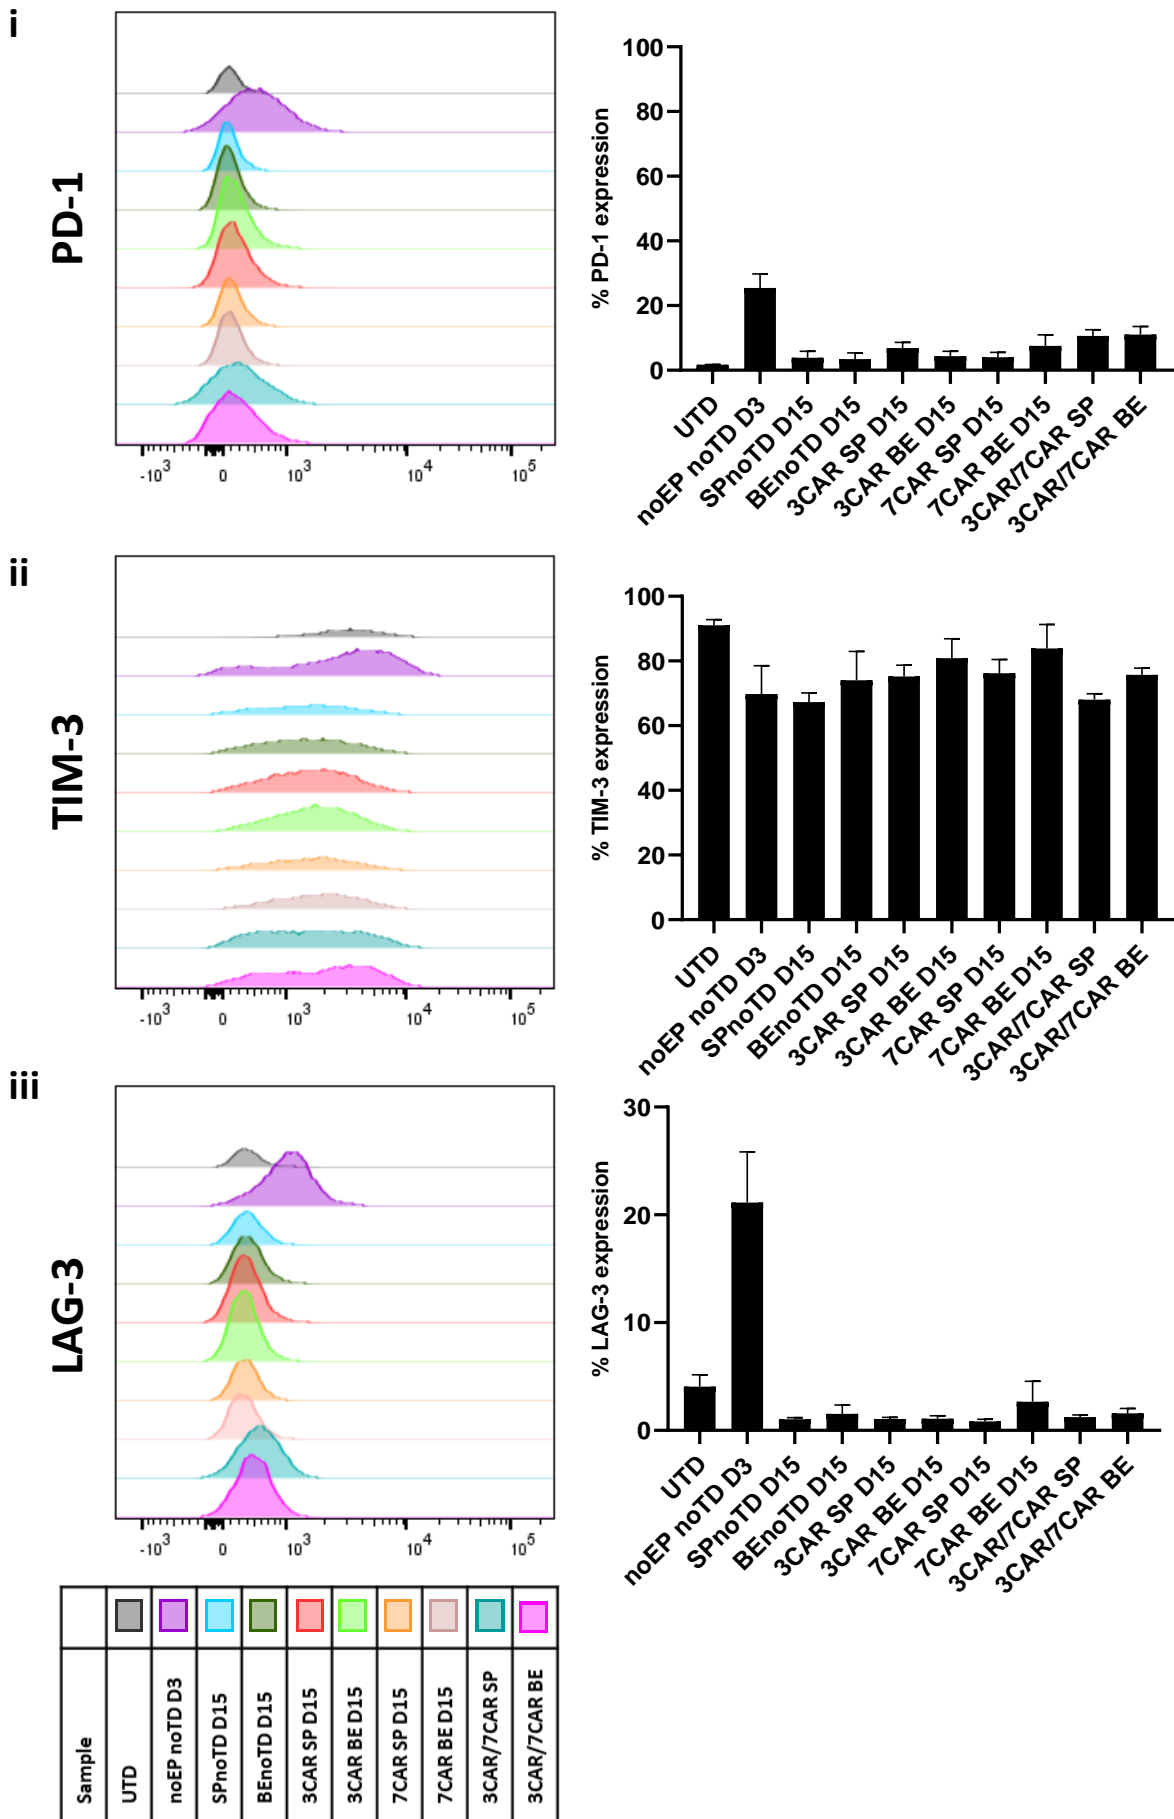

**Supplementary Figure 5. Exhaustion marker expression following SpCas9 editing or cytidine deamination in 3CAR and 7CAR T cells.**

T cells from n=3 healthy primary donors were electroporated with either SpCas9 or coBE3 mRNA and sgRNAs targeting TRBC and CD7. Edited cells were transduced with either 3CAR or 7CAR lentiviral vectors and cultured for 15 days. Cells (gated on CD45<sup>+</sup>CD2<sup>+</sup>) were analysed for expression of **(i)** PD-1, **(ii)** TIM-3 and **(iii)** LAG-3 at end of culture. Panels on the left depict representative mean fluorescence intensity (MFI) data from n=1 of 3 donors. Histograms on the right quantify expression of each marker across n=3 donors. Error bars represent SEM across n=3 donors.

# Supplementary Figure 6

**A**

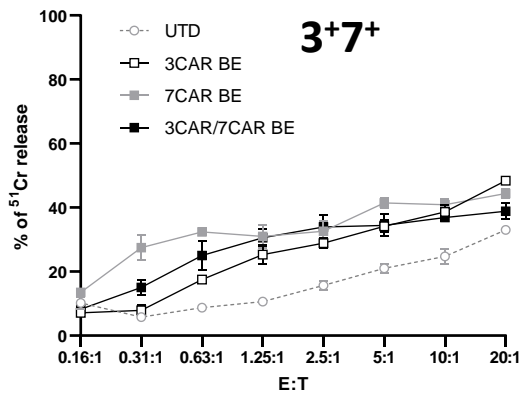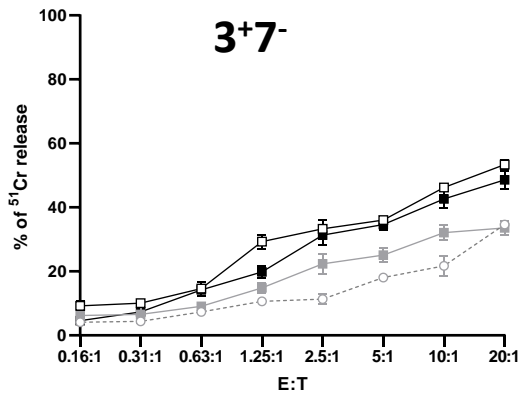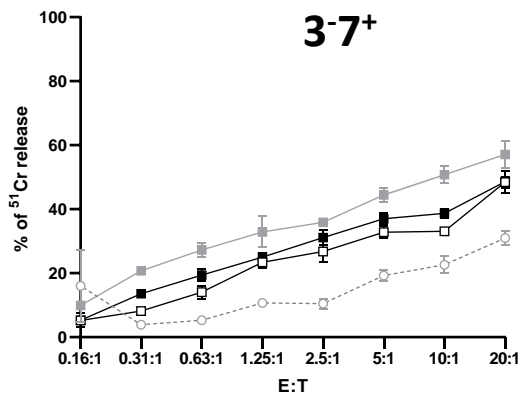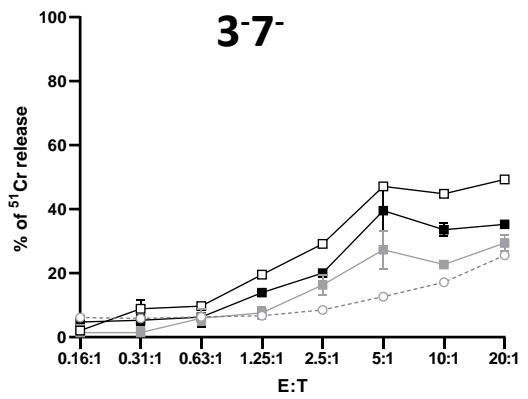

**B**

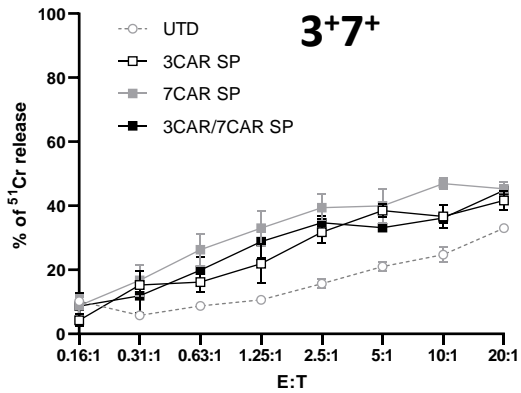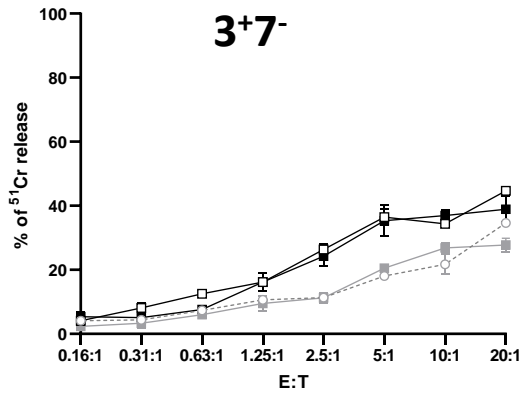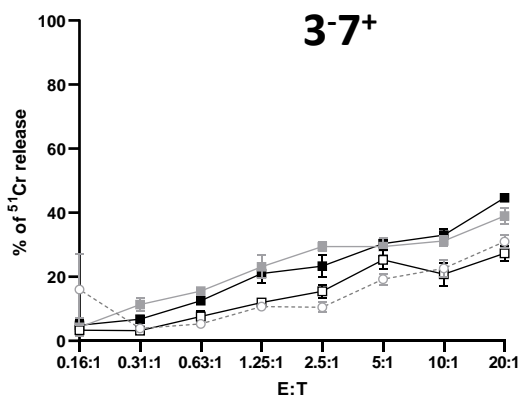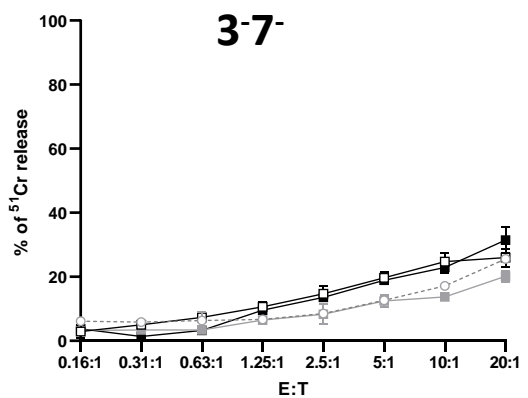

**Supplementary Figure 6. 3CAR/7CAR T cells mediate potent killing of T-ALL cells in vitro.**

In vitro cytotoxicity of 3CAR and 7CAR cells against T-ALL cell line targets. **A)**  $^{51}\text{Cr}$  labelled Jurkat T cells modified to express  $\text{CD3}^+\text{CD7}^+$ ,  $\text{CD3}^+\text{CD7}^-$ ,  $\text{CD3}^-\text{CD7}^+$  or  $\text{CD3}^-\text{CD7}^-$  were co-cultured with coBE3 edited  $\text{CD3}^-\text{CD7}^-$  3CAR (white squares), 7CAR (grey squares), mixed 3CAR/7CAR (black squares) or untransduced (white circles) cells at an increasing ratio of effectors:targets (E:T). **B)**  $^{51}\text{Cr}$  labelled Jurkat T cell interactions co-cultured with SpCas9 edited  $\text{CD3}^-\text{CD7}^-$  3CAR (white squares), 7CAR (grey squares), mixed 3CAR/7CAR (black squares) or untransduced (white circles) cells at an increasing ratio of effectors:targets (E:T). Error bars represent SEM of (n=3) technical replicates.

# Supplementary Figure 7

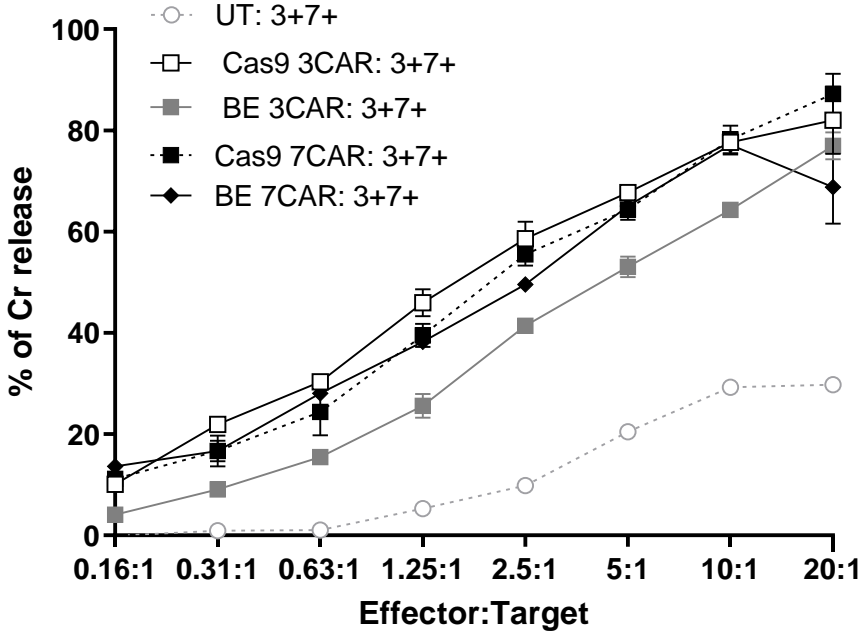

**Supplementary Figure 7. SpCas9 and coBE3 3CAR and 7CAR primary T cells demonstrate comparable target cell lysis *in vitro*.**

In vitro cytotoxic activity of SpCas9 or coBE3 edited 3CAR, 7CAR cells or untransduced negative control effector T cells against  $^{51}\text{Cr}$  loaded CD3<sup>+</sup>CD7<sup>+</sup> Jurkat T cell targets at an increasing effector:target (E:T) ratio. Points represent mean of n=3 experimental triplicates and error bars represent SEM.

# Supplementary Figure 8

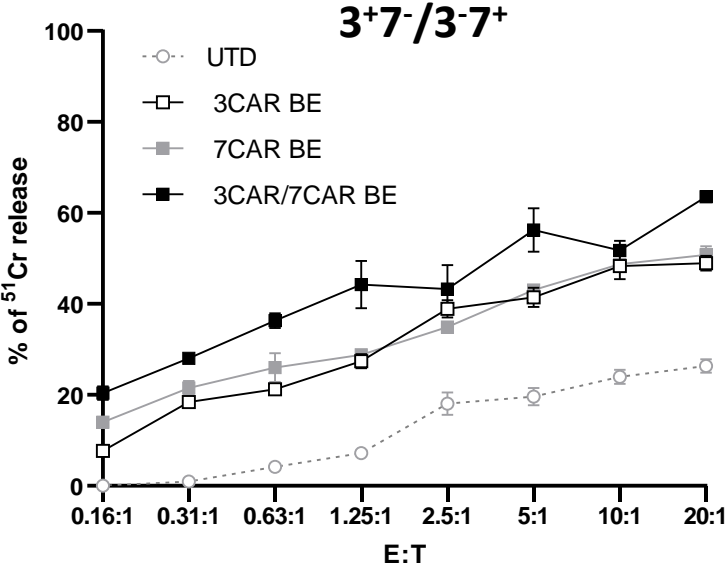

**Supplementary Figure 8. Combined 3CAR/7CAR T cells exhibit efficient lysis of heterogeneous CD3<sup>+/</sup>-CD7<sup>+/</sup>- T-ALL cells in vitro.**

In vitro cytotoxicity of base edited 3CAR and 7CAR cells against mixed CD3<sup>+/</sup>-CD7<sup>+/</sup>- T-ALL cell line targets. <sup>51</sup>Cr labelled CD3<sup>+</sup>CD7<sup>-</sup>, CD3<sup>-</sup>CD7<sup>+</sup> modified Jurkat T cells mixed at a ratio of 1:1 were co-cultured with coBE3 edited CD3<sup>-</sup>CD7<sup>-</sup> 3CAR (white squares), 7CAR (grey squares), mixed 3CAR/7CAR (black squares) or untransduced (white circles) cells at an increasing ratio of effectors:targets (E:T). Error bars represent SEM of (n=3) technical replicates.



# Supplementary Figure 9

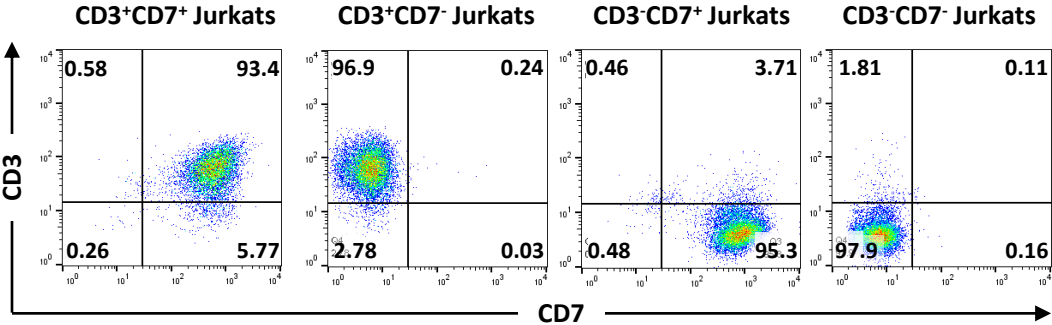

**Supplementary Figure 9. Jurkat T cells modified for to express CD3 and/or CD7 surface antigen.**

Jurkat T cells electroporated with SpCas9 mRNA and TRBC and/or CD7 targeting sgRNAs and sorted for CD3<sup>+</sup>CD7<sup>+</sup>, CD3<sup>+</sup>CD7<sup>-</sup>, CD3<sup>-</sup>CD7<sup>+</sup> and CD3<sup>-</sup>CD7<sup>-</sup>. Flow cytometry of CD3 and CD7 expression of edited and sorted Jurkat T cells confirming surface antigen expression.

# Supplementary Figure 10

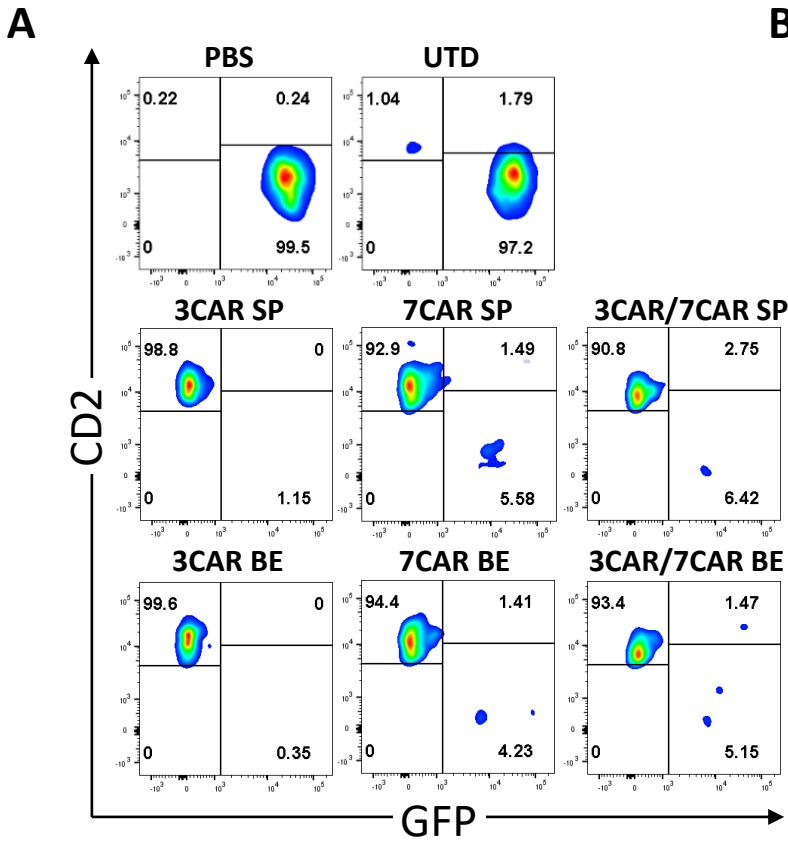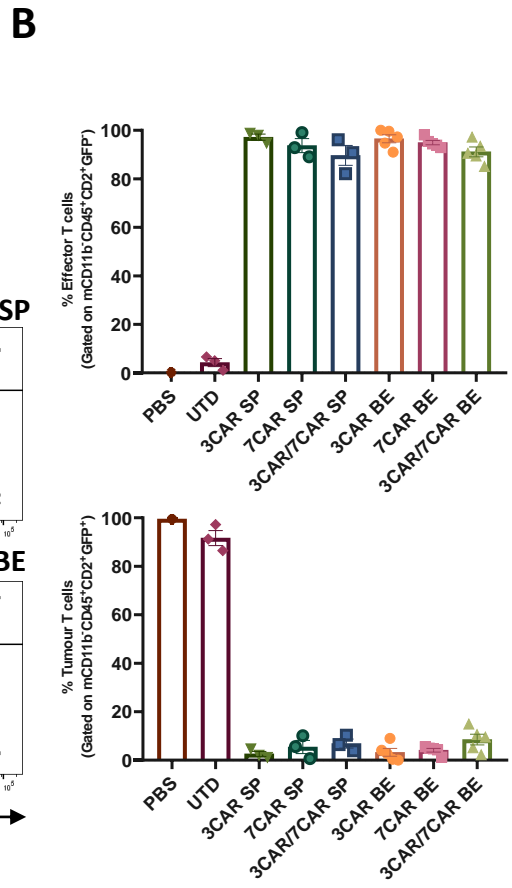

**Supplementary Figure 10. Base edited 3CAR and 7CAR cells demonstrate comparable anti-tumour clearance in vivo to CRISPR-Cas9 edited cells.**

NOD/SCID/ $\gamma c^{-/-}$  (NSG) mice (n=28) were intravenously injected with  $10 \times 10^6$  GFP<sup>+</sup>LUC<sup>+</sup> CD3<sup>+</sup>CD7<sup>+</sup> Jurkat T cells prior to receiving an IV infusion of  $10 \times 10^6$  SpCas9 edited TCR<sup>-</sup>CD7<sup>-</sup> 3CAR (n=3),  $10 \times 10^6$  SpCas9 edited TCR<sup>-</sup>CD7<sup>-</sup> 7CAR (n=3),  $10 \times 10^6$  SpCas9 edited TCR<sup>-</sup>CD7<sup>-</sup> 3CAR/7CAR (n=3),  $10 \times 10^6$  coBE3 edited TCR<sup>-</sup>CD7<sup>-</sup> 3CAR (n=5),  $10 \times 10^6$  coBE3 edited TCR<sup>-</sup>CD7<sup>-</sup> 7CAR (n=5), or  $10 \times 10^6$  coBE3 edited TCR<sup>-</sup>CD7<sup>-</sup> 3CAR/7CAR (n=5) effectors. Control mice received untransduced (UTD) cells (n=3) or PBS (n=1). Leukemic progression was monitored by serial bioluminescent imaging (BLI) until day 31 when all groups were sacrificed. **A)** Representative flow cytometry plots of effector (CD2<sup>+</sup>GFP<sup>-</sup>) and tumour (CD2<sup>+</sup>GFP<sup>+</sup>) subpopulations detected in bone marrow aspirates subgated on Live>mCD11b->hCD45<sup>+</sup>. **B)** Proportion of effector T cells (top) or tumour cells (bottom) when subgated on Live>mCD11b->hCD45<sup>+</sup>. Error bars represent SEM. \*\*\* $P < 0.001$  \*\*\*\* $P < 0.0001$ .

# Supplementary Figure 11

**A**

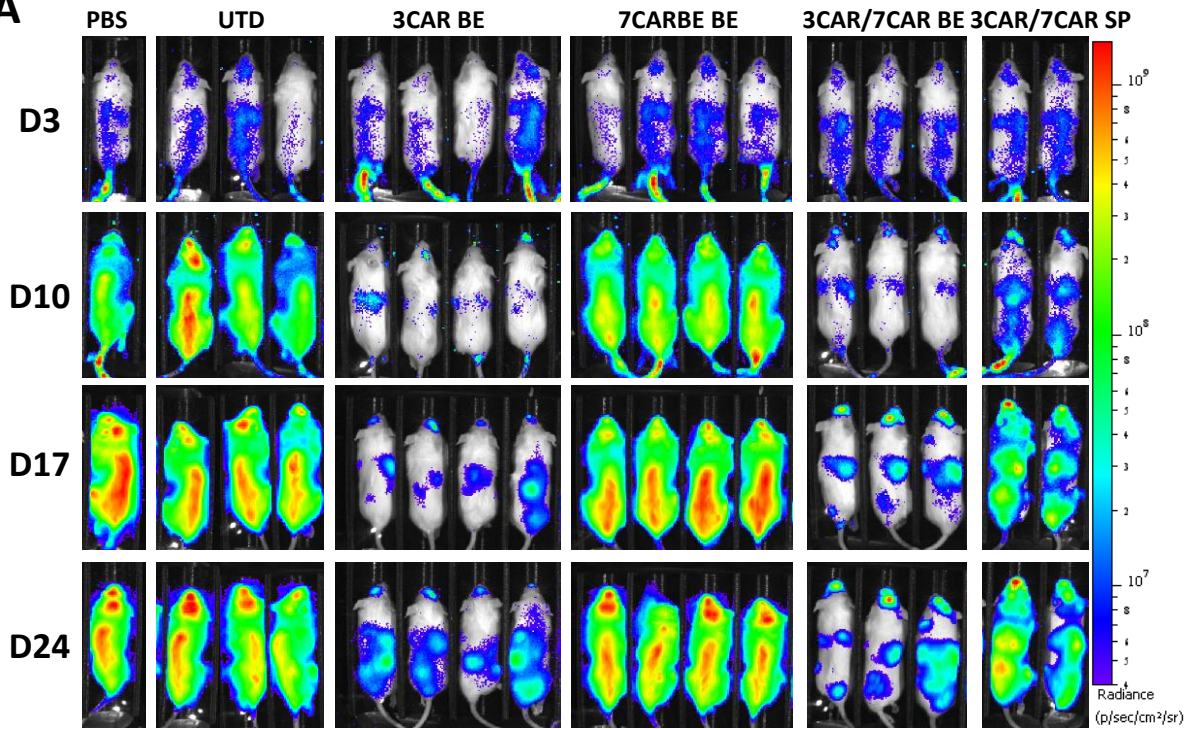

**B**

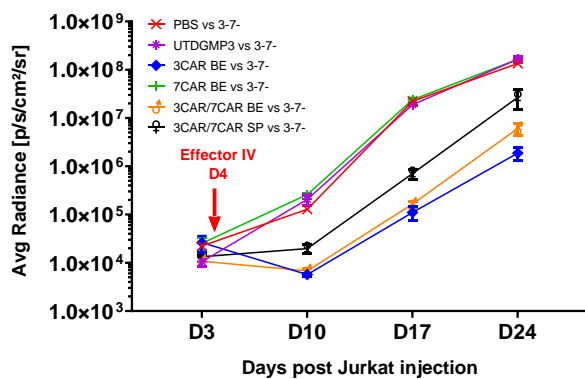

**D**

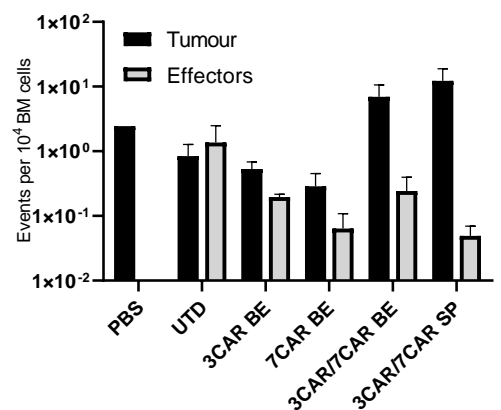

**C**

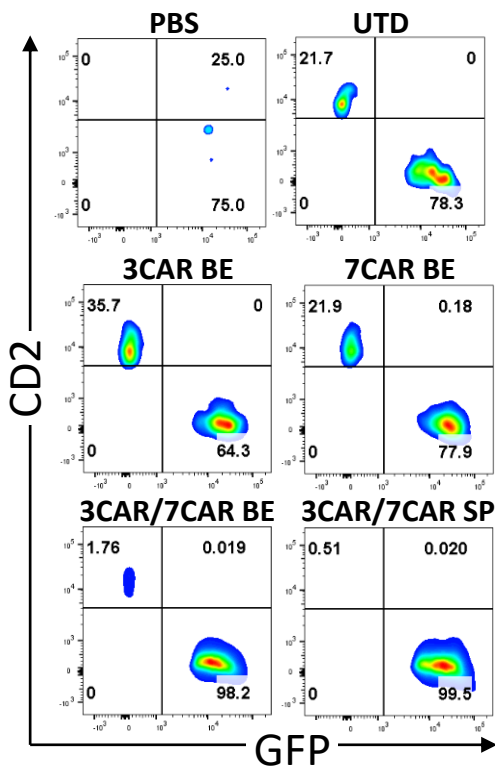

**E**

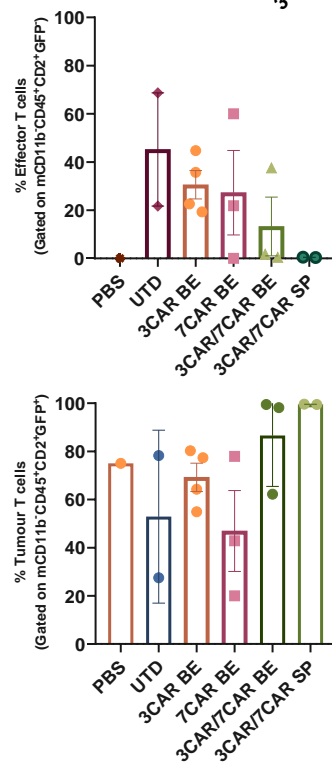

**Supplementary Figure 11. Target CD3 and CD7 antigen ablation leads to tumour progression in in vivo model.**

**A)** n=17 NOD/SCID/ $\gamma$ c<sup>-/-</sup> (NSG) mice were intravenously injected with  $10 \times 10^6$  GFP<sup>+</sup>LUC<sup>+</sup> Jurkat T cells edited for the disruption of CD3 and CD7 (Day 0) prior to receiving an IV infusion of effector T cells (Day 4). Mice received either  $10 \times 10^6$  coBE3 edited TCR<sup>-</sup>CD7<sup>-</sup> 3CAR (n=4),  $10 \times 10^6$  coBE3 edited TCR<sup>-</sup>CD7<sup>-</sup> 7CAR (n=4),  $10 \times 10^6$  coBE3 edited TCR<sup>-</sup>CD7<sup>-</sup> 3CAR/7CAR (n=3), or  $10 \times 10^6$  SpCas9 edited TCR<sup>-</sup>CD7<sup>-</sup> 3CAR/7CAR (n=2) effectors. Control mice received untransduced (UTD) cells from an unrelated donor (n=3) or PBS (n=1). Leukemic progression was monitored by serial bioluminescent imaging (BLI) until day 24 when all groups were sacrificed. **B)** Bioluminescence signal of each animal plotted as Average radiance [photons/sec/cm<sup>2</sup>/sr]. Each line represents a different experimental group and each point on the line the mean of each group. Error bars represent SEM. **C)** Representative flow cytometry plots of effector (CD2<sup>+</sup>GFP<sup>-</sup>) and tumour (CD2<sup>+</sup>GFP<sup>+</sup>) subpopulations detected in bone marrow aspirates subgated on Live>mCD11b->hCD45<sup>+</sup>. **D)** Number of effector events or tumour events per  $1 \times 10^4$  acquired bone marrow events. **E)** Proportion of effector T cells (top) or tumour cells (bottom) when subgated on Live>mCD11b->hCD45<sup>+</sup>. Error bars represent SEM.

# Supplementary Figure 12

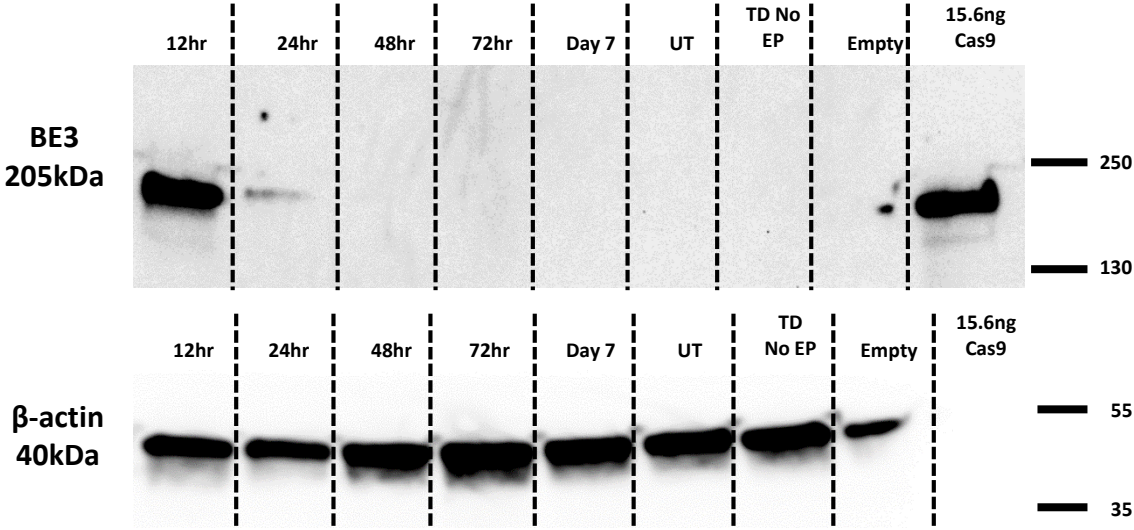

**Supplementary Figure 12. Base editor protein dilution following primary T cell culture.**

Cell lysates from primary T cells transduced with a Terminal-TRAC-CAR19 lentiviral vector at MOI 5 and exposed to coBE3 mRNA (50 $\mu$ g/ml) by electroporation were collected 12, 24, 48, 72 hours post culture and again on day 7 of culture. Untransduced cell lysate was also collected at day 7 and used as a negative control. 20 $\mu$ g of BCA-normalised total protein was loaded on a 4%-15% SDS-PAGE alongside positive SpCas9 protein control (15.6ng). Membrane was probed with anti-CRISPR-cas9 primary and sheep anti-mouse-HRP secondary antibody. Cas9 positive bands detected at 205kDa. Membrane was probed with anti b-actin primary antibody and sheep anti-mouse-HRP secondary antibody as a marker of loading detected at 40 kDa.



# Supplementary Figure 13

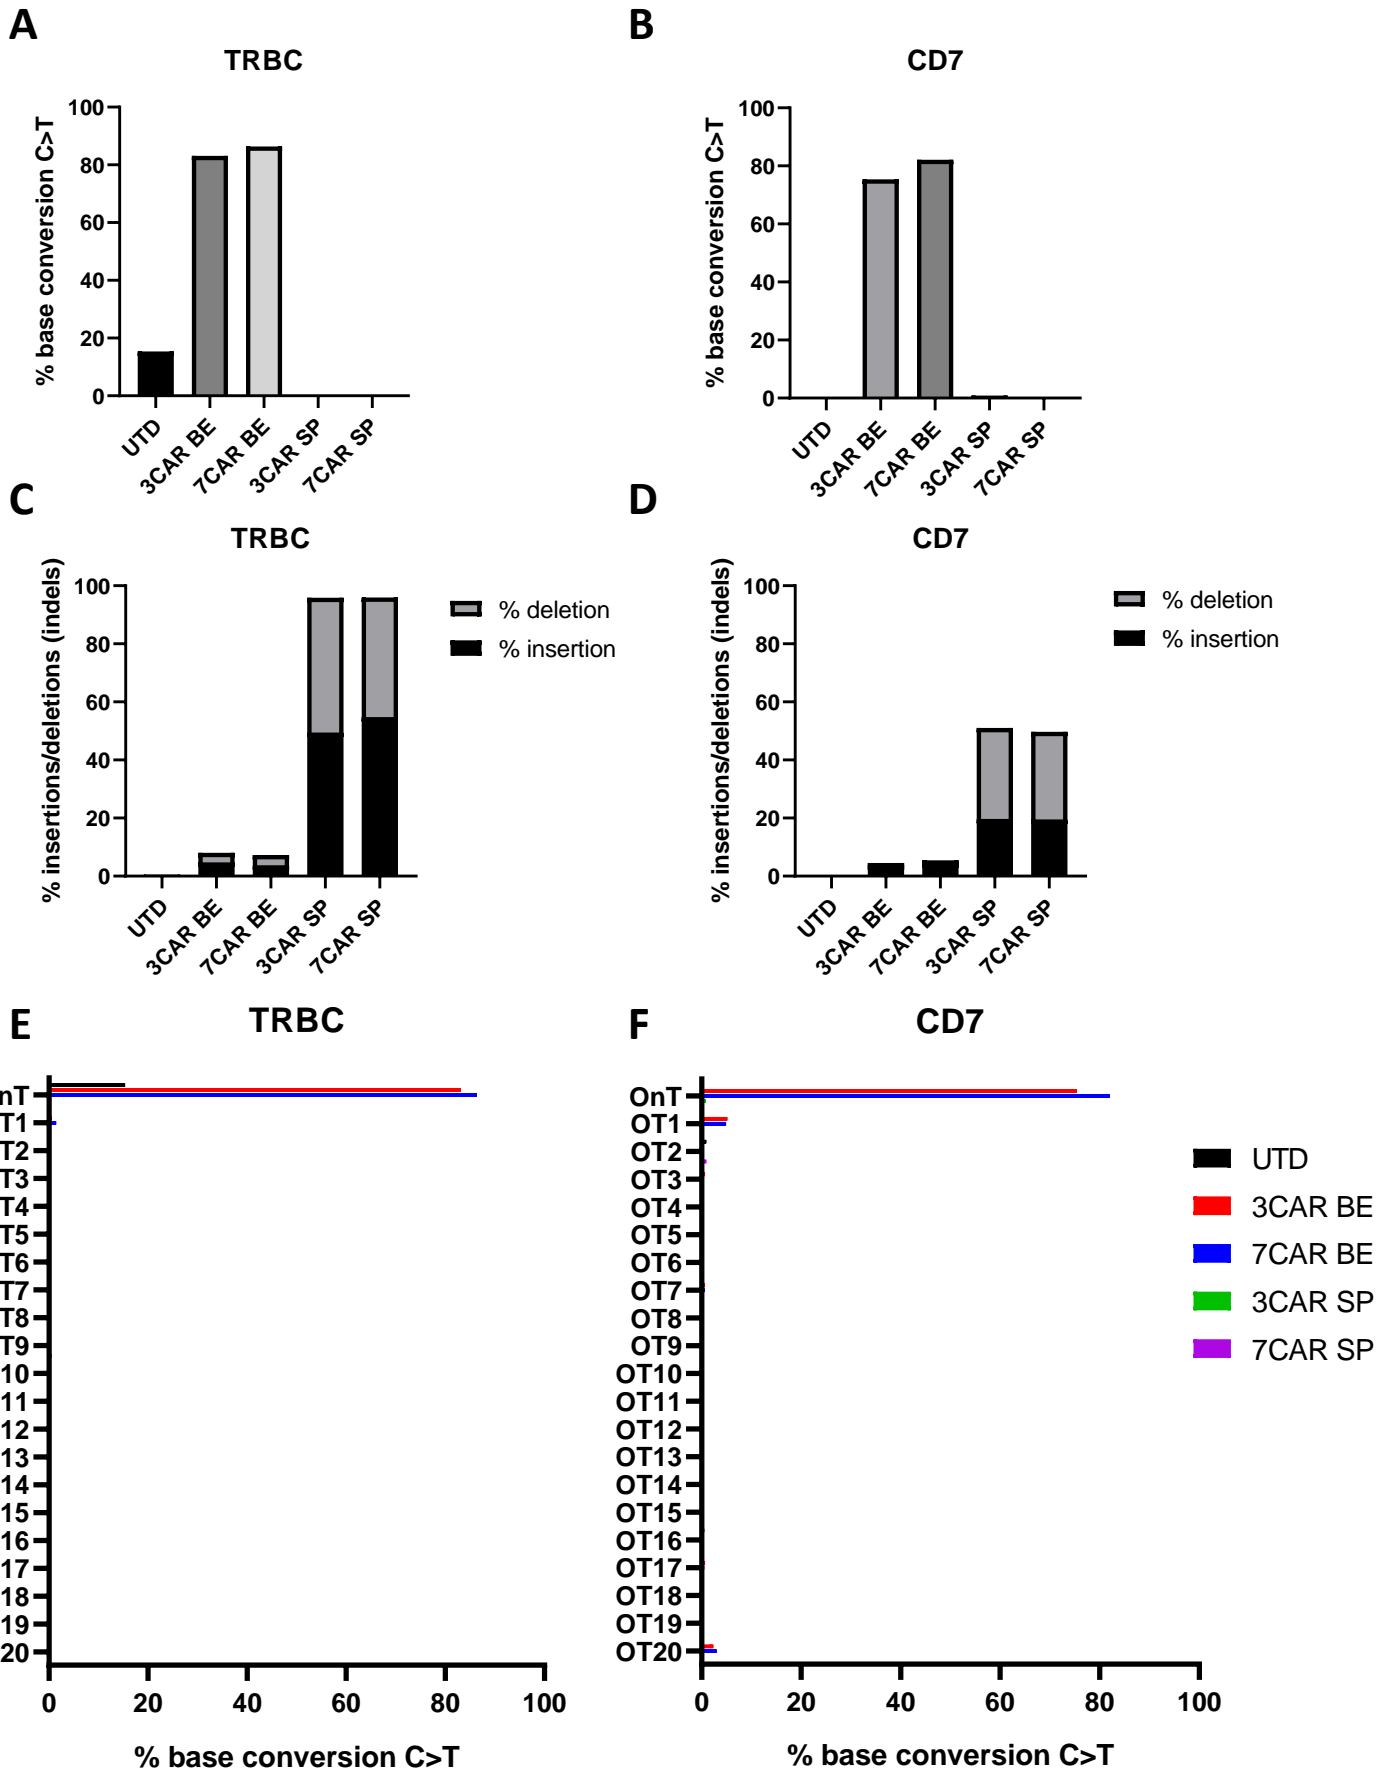

**Supplementary Figure 13. Identification of base conversion and indel frequencies at *in silico* predicted 'off-target' sites.**

DNA from T cells edited at the TRBC and CD7 loci with either coBE3 or SpCas9 mRNA and transduced with 3CAR or 7CAR was subjected to next generation sequencing for the detection of on-target (OnT) NHEJ events or C>T base conversion across the top 20 guide dependent *in silico* predicted 'off-target' (OT) sites for TRBC and CD7 targeting sgRNAs. On-target C>T base conversion frequency in coBE3 or SpCas9 edited samples at **A)** TRBC, and **B)** CD7 loci. Insertion or deletion frequency leading to NHEJ in coBE3 or SpCas9 edited samples at on-target **C)** TRBC, and **D)** CD7 genomic sites. C>T base conversion at top 20 'off-target' sites for **E)** TRBC, and **F)** CD7 presented as average conversion across C bases within the 5 bp editing window of rAPOBEC1.

**Supplementary Table S1.** Target-specific primer combinations for NGS on top 20 Benchling off-targets for TRBC and CD7 target sequences. Following an internally-built workflow, a 20bp window around the predicted off-target nucleotide position, was analysed to a minor allele frequency of 0.01%. Primer sequences are given in the 5'-3' orientation. Fwd: forward, Rev: reverse.

| Off-target | Sequence               | PAM | Chromosome | ChromStart | ChromEnd  |
|------------|------------------------|-----|------------|------------|-----------|
| TRBC-on    | CCCACCAGCTCAGCTCCACG   | TGG | chr7       | 142498843  | 142498862 |
| TRBC-01    | CCTTCCAGCTCAGCTCCACG   | TAG | chr19      | 47660965   | 47660984  |
| TRBC-02    | TCCACCAGCTCAGCTCCACG   | GAG | chr9       | 127039147  | 127039166 |
| TRBC-03    | CTACCAAGTCAGCTCCACG    | CAG | chr20      | 31603858   | 31603877  |
| TRBC-04    | GCCACAATCTCAGCTCCACG   | GGG | chr6       | 151908255  | 151908274 |
| TRBC-05    | CTACCAGCCAAGCTCCACG    | GGG | chr5       | 152916938  | 152916957 |
| TRBC-06    | CCCAGCAGTCCAGCTCCACG   | CAG | chr17      | 43195462   | 43195481  |
| TRBC-07    | GCCATCAGCTCAGCTCCATG   | CAG | chr6       | 51981591   | 51981610  |
| TRBC-08    | GCCAGCAGCTCAGCTCCATG   | TGG | chr2       | 240938429  | 240938448 |
| TRBC-09    | ATCACCAGCTCAGCTCCAGG   | CGG | chr9       | 87606587   | 87606606  |
| TRBC-10    | CTGAGCAGCACAGCTCCACG   | CAG | chr4       | 186761189  | 186761208 |
| TRBC-11    | CAGGCCAGCCAGCTCCACG    | AGG | chr1       | 201390814  | 201390833 |
| TRBC-12    | CCCCACACCCAGCTCCACG    | AGG | chr17      | 79561515   | 79561534  |
| TRBC-13    | CCGTCCAGCTCAGCTCCAAG   | GGG | chr17      | 71281007   | 71281026  |
| TRBC-14    | CCGACCACCTCAGCTCCAGG   | AAG | chr21      | 26458611   | 26458630  |
| TRBC-15    | GCCACCCGCTCAGCTCCAAG   | CAG | chrX       | 47297557   | 47297576  |
| TRBC-16    | ACCATCATGTCTCAGCTCCACG | AGG | chr22      | 50925765   | 50925784  |
| TRBC-17    | GACACCAACTCAGCTCCACT   | CAG | chr11      | 70677520   | 70677539  |
| TRBC-18    | CACCACAGTTCAGCTCCACG   | GAG | chr16      | 20071470   | 20071489  |
| TRBC-19    | CCCACCACTCGGCTCCACG    | CAG | chr16      | 89055350   | 89055369  |
| TRBC-20    | TGCATAAGCTCAGCTCCACG   | CAG | chr8       | 40188393   | 40188412  |

| Off-target | Sequence               | PAM | Chromosome | ChromStart | ChromEnd  |
|------------|------------------------|-----|------------|------------|-----------|
| CD7-on     | CACCTGCCAGGCCATCACGG   | AGG | chr17      | 80274585   | 80274604  |
| CD7-01     | CTCCTGCCAGGCCATCATGG   | GGG | chr17      | 16384936   | 16384955  |
| CD7-02     | CACCAGCGAGACCATCACGG   | CGG | chr5       | 168347501  | 168347520 |
| CD7-03     | CCCCGGCCAGGCCATCACAG   | GGG | chr17      | 77615816   | 77615835  |
| CD7-04     | CCCCGGCCAGGCCATCACAG   | GGG | chr17      | 77514495   | 77514514  |
| CD7-05     | CACCTGCCAGGGCATCACAG   | GAG | chr17      | 38518298   | 38518317  |
| CD7-06     | CGCCAGCATGGCCATCACGG   | GAG | chr6       | 4511412    | 4511431   |
| CD7-07     | CAGCCTCAAGGCCATCACGG   | CGG | chr9       | 131584856  | 131584875 |
| CD7-08     | CAACTGCCAGACCATCACTG   | CAG | chr8       | 128695088  | 128695107 |
| CD7-09     | TCCCTGCAAGGCCATCACTG   | TGG | chr5       | 5768818    | 5768837   |
| CD7-10     | CACCTGCCAGGCCATCTCTG   | TGG | chr10      | 134652817  | 134652836 |
| CD7-11     | CTTCTTCCAGCCATCACGG    | AGG | chr17      | 712317     | 712336    |
| CD7-12     | CTCCTGCCAGCCAGCACGG    | CAG | chr5       | 7662631    | 7662650   |
| CD7-13     | CTCCGGACAGGCCATCTCGG   | GGG | chr1       | 17511832   | 17511851  |
| CD7-14     | CCACTTCCAGGGCATCACGG   | GAG | chr10      | 99628963   | 99628982  |
| CD7-15     | ATCCTGGCAGGCCATCACTG   | AAG | chr18      | 42523708   | 42523727  |
| CD7-16     | AGCCTGTCTCAGGCCATCACAG | AAG | chr20      | 52447203   | 52447222  |
| CD7-17     | CAGCCTCCAGGACATCACGG   | AGG | chrX       | 591794     | 591813    |
| CD7-18     | CTCCTGCCAGCCATCAGGG    | TAG | chr19      | 19215793   | 19215812  |
| CD7-19     | GCCCTGCCTGGCCATACCG    | CAG | chr9       | 100158442  | 100158461 |
| CD7-20     | TCCCTCCCAGGCCATCACTG   | AGG | chr12      | 58303936   | 58303955  |

**Supplementary Table S2:** Next generation sequencing data analysis of top 20 guide-dependent off-target sites for **A) TRBC** or **B) CD7**. Percentage C>T conversion in coBE3 or SpCas9 treated samples across C bases within each 20 bp off-target sequence.

A)

| Gene | OT | C position | % base conversion C>T |         |         |         |         |
|------|----|------------|-----------------------|---------|---------|---------|---------|
|      |    |            | UTD                   | 3CAR BE | 7CAR BE | 3CAR SP | 7CAR SP |
| TRBC | 1  | 19         | 0.00                  | 0.02    | 0.05    | 0.03    | 0.02    |
| TRBC | 1  | 17         | 0.01                  | 0.02    | 0.05    | 0.01    | 0.00    |
| TRBC | 1  | 16         | 0.04                  | 0.02    | 0.02    | 0.01    | 0.00    |
| TRBC | 1  | 14         | 0.02                  | 0.04    | 0.05    | 0.01    | 0.00    |
| TRBC | 1  | 11         | 0.03                  | 0.02    | 0.36    | 0.04    | 0.02    |
| TRBC | 1  | 9          | 0.03                  | 0.09    | 0.02    | 0.00    | 0.02    |
| TRBC | 1  | 6          | 0.02                  | 0.49    | 1.34    | 0.00    | 0.00    |
| TRBC | 1  | 5          | 0.02                  | 0.67    | 1.55    | 0.05    | 0.00    |
| TRBC | 1  | 2          | 0.03                  | 0.02    | 0.10    | 0.04    | 0.10    |
| TRBC | 1  | 1          | 0.02                  | 0.04    | 0.06    | 0.00    | 0.00    |
| TRBC | 2  | 19         | 0.00                  | 0.00    | 0.09    | 0.00    | 0.00    |
| TRBC | 2  | 17         | 0.06                  | 0.00    | 0.00    | 0.00    | 0.00    |
| TRBC | 2  | 16         | 0.00                  | 0.00    | 0.00    | 0.09    | 0.00    |
| TRBC | 2  | 14         | 0.06                  | 0.00    | 0.08    | 0.00    | 0.00    |
| TRBC | 2  | 11         | 0.00                  | 0.00    | 0.00    | 0.00    | 0.00    |
| TRBC | 2  | 8          | 0.00                  | 0.00    | 0.17    | 0.00    | 0.00    |
| TRBC | 2  | 6          | 0.12                  | 0.12    | 0.08    | 0.09    | 0.00    |
| TRBC | 2  | 5          | 0.00                  | 0.00    | 0.08    | 0.00    | 0.00    |
| TRBC | 2  | 3          | 0.00                  | 0.00    | 0.08    | 0.00    | 0.00    |
| TRBC | 2  | 2          | 0.00                  | 0.12    | 0.16    | 0.00    | 0.00    |
| TRBC | 3  | 19         | 0.00                  | 0.00    | 0.26    | 0.00    | 0.07    |
| TRBC | 3  | 17         | 0.00                  | 0.00    | 0.00    | 0.00    | 0.04    |
| TRBC | 3  | 16         | 0.00                  | 0.00    | 0.00    | 0.04    | 0.07    |
| TRBC | 3  | 14         | 0.00                  | 0.00    | 0.00    | 0.00    | 0.04    |
| TRBC | 3  | 11         | 0.10                  | 0.00    | 0.00    | 0.00    | 0.00    |
| TRBC | 3  | 6          | 0.00                  | 0.00    | 0.00    | 0.00    | 0.04    |
| TRBC | 3  | 5          | 0.05                  | 0.00    | 0.00    | 0.08    | 0.00    |
| TRBC | 3  | 3          | 0.00                  | 0.00    | 0.00    | 0.04    | 0.00    |
| TRBC | 3  | 1          | 0.00                  | 0.00    | 0.00    | 0.00    | 0.00    |
| TRBC | 4  | 19         | 0.04                  | 0.15    | 0.00    | 0.05    | 0.01    |
| TRBC | 4  | 17         | 0.04                  | 0.06    | 0.00    | 0.06    | 0.04    |
| TRBC | 4  | 16         | 0.08                  | 0.00    | 0.07    | 0.00    | 0.04    |
| TRBC | 4  | 14         | 0.04                  | 0.09    | 0.00    | 0.02    | 0.01    |
| TRBC | 4  | 11         | 0.00                  | 0.09    | 0.07    | 0.00    | 0.06    |
| TRBC | 4  | 9          | 0.00                  | 0.12    | 0.00    | 0.02    | 0.01    |
| TRBC | 4  | 5          | 0.00                  | 0.06    | 0.13    | 0.02    | 0.03    |
| TRBC | 4  | 3          | 0.04                  | 0.06    | 0.07    | 0.05    | 0.10    |
| TRBC | 4  | 2          | 0.00                  | 0.00    | 0.07    | 0.02    | 0.01    |
| TRBC | 5  | 19         | 0.03                  | 0.05    | 0.12    | 0.01    | 0.05    |
| TRBC | 5  | 17         | 0.06                  | 0.05    | 0.11    | 0.02    | 0.07    |

|      |    |    |      |      |      |      |      |
|------|----|----|------|------|------|------|------|
| TRBC | 5  | 16 | 0.00 | 0.09 | 0.04 | 0.01 | 0.03 |
| TRBC | 5  | 14 | 0.03 | 0.12 | 0.05 | 0.06 | 0.04 |
| TRBC | 5  | 10 | 0.06 | 0.05 | 0.14 | 0.08 | 0.03 |
| TRBC | 5  | 9  | 0.01 | 0.04 | 0.00 | 0.04 | 0.03 |
| TRBC | 5  | 6  | 0.01 | 0.09 | 0.11 | 0.06 | 0.03 |
| TRBC | 5  | 5  | 0.06 | 0.05 | 0.13 | 0.03 | 0.05 |
| TRBC | 5  | 3  | 0.01 | 0.05 | 0.04 | 0.02 | 0.03 |
| TRBC | 5  | 1  | 0.06 | 0.11 | 0.08 | 0.09 | 0.06 |
| TRBC | 6  | 1  | 0.10 | 0.00 | 0.00 | 0.00 | 0.00 |
| TRBC | 6  | 2  | 0.05 | 0.08 | 0.00 | 0.00 | 0.04 |
| TRBC | 6  | 3  | 0.05 | 0.24 | 0.07 | 0.00 | 0.08 |
| TRBC | 6  | 6  | 0.05 | 0.00 | 0.07 | 0.00 | 0.04 |
| TRBC | 6  | 10 | 0.10 | 0.08 | 0.07 | 0.05 | 0.08 |
| TRBC | 6  | 11 | 0.05 | 0.15 | 0.00 | 0.00 | 0.04 |
| TRBC | 6  | 14 | 0.05 | 0.07 | 0.07 | 0.05 | 0.04 |
| TRBC | 6  | 16 | 0.14 | 0.15 | 0.07 | 0.00 | 0.04 |
| TRBC | 6  | 17 | 0.10 | 0.08 | 0.00 | 0.05 | 0.04 |
| TRBC | 6  | 19 | 0.00 | 0.08 | 0.00 | 0.00 | 0.12 |
| TRBC | 7  | 2  | 0.05 | 0.09 | 0.05 | 0.04 | 0.05 |
| TRBC | 7  | 3  | 0.07 | 0.03 | 0.03 | 0.06 | 0.06 |
| TRBC | 7  | 6  | 0.02 | 0.01 | 0.02 | 0.02 | 0.02 |
| TRBC | 7  | 9  | 0.05 | 0.03 | 0.03 | 0.05 | 0.02 |
| TRBC | 7  | 11 | 0.05 | 0.03 | 0.04 | 0.08 | 0.04 |
| TRBC | 7  | 14 | 0.04 | 0.02 | 0.03 | 0.05 | 0.06 |
| TRBC | 7  | 16 | 0.05 | 0.01 | 0.01 | 0.02 | 0.05 |
| TRBC | 7  | 17 | 0.05 | 0.05 | 0.06 | 0.05 | 0.05 |
| TRBC | 8  | 17 | 0.06 | 0.10 | 0.09 | 0.10 | 0.07 |
| TRBC | 8  | 16 | 0.06 | 0.07 | 0.06 | 0.07 | 0.08 |
| TRBC | 8  | 14 | 0.05 | 0.12 | 0.06 | 0.09 | 0.03 |
| TRBC | 8  | 11 | 0.06 | 0.01 | 0.07 | 0.08 | 0.05 |
| TRBC | 8  | 9  | 0.03 | 0.10 | 0.07 | 0.08 | 0.05 |
| TRBC | 8  | 6  | 0.05 | 0.12 | 0.06 | 0.10 | 0.03 |
| TRBC | 8  | 3  | 0.07 | 0.03 | 0.07 | 0.07 | 0.07 |
| TRBC | 8  | 2  | 0.09 | 0.03 | 0.09 | 0.09 | 0.02 |
| TRBC | 9  | 17 | 0.01 | 0.02 | 0.02 | 0.05 | 0.03 |
| TRBC | 9  | 16 | 0.01 | 0.02 | 0.02 | 0.03 | 0.02 |
| TRBC | 9  | 14 | 0.02 | 0.02 | 0.02 | 0.01 | 0.08 |
| TRBC | 9  | 11 | 0.01 | 0.02 | 0.02 | 0.02 | 0.17 |
| TRBC | 9  | 9  | 0.01 | 0.01 | 0.02 | 0.00 | 0.05 |
| TRBC | 9  | 6  | 0.03 | 0.02 | 0.05 | 0.03 | 0.63 |
| TRBC | 9  | 5  | 0.01 | 0.03 | 0.02 | 0.04 | 0.31 |
| TRBC | 9  | 3  | 0.02 | 0.02 | 0.07 | 0.02 | 0.50 |
| TRBC | 10 | 1  | 0.02 | 0.03 | 0.01 | 0.01 | 0.02 |
| TRBC | 10 | 6  | 0.05 | 0.04 | 0.03 | 0.03 | 0.02 |
| TRBC | 10 | 9  | 0.03 | 0.01 | 0.03 | 0.04 | 0.04 |
| TRBC | 10 | 11 | 0.02 | 0.00 | 0.01 | 0.02 | 0.04 |
| TRBC | 10 | 14 | 0.02 | 0.01 | 0.02 | 0.02 | 0.04 |

|      |    |    |      |      |      |      |      |
|------|----|----|------|------|------|------|------|
| TRBC | 10 | 16 | 0.02 | 0.06 | 0.02 | 0.03 | 0.05 |
| TRBC | 10 | 17 | 0.02 | 0.03 | 0.03 | 0.03 | 0.04 |
| TRBC | 10 | 19 | 0.03 | 0.03 | 0.04 | 0.03 | 0.08 |
| TRBC | 11 | 19 | 0.04 | 0.02 | 0.00 | 0.03 | 0.05 |
| TRBC | 11 | 17 | 0.00 | 0.00 | 0.00 | 0.03 | 0.02 |
| TRBC | 11 | 16 | 0.08 | 0.05 | 0.00 | 0.09 | 0.02 |
| TRBC | 11 | 14 | 0.02 | 0.03 | 0.04 | 0.10 | 0.00 |
| TRBC | 11 | 11 | 0.02 | 0.03 | 0.02 | 0.03 | 0.10 |
| TRBC | 11 | 10 | 0.00 | 0.09 | 0.10 | 0.03 | 0.05 |
| TRBC | 11 | 9  | 0.12 | 0.09 | 0.00 | 0.06 | 0.00 |
| TRBC | 11 | 6  | 0.06 | 0.12 | 0.08 | 0.06 | 0.00 |
| TRBC | 11 | 5  | 0.06 | 0.02 | 0.04 | 0.03 | 0.05 |
| TRBC | 11 | 1  | 0.02 | 0.00 | 0.00 | 0.00 | 0.05 |
| TRBC | 12 | 1  | 0.01 | 0.02 | 0.02 | 0.04 | 0.03 |
| TRBC | 12 | 2  | 0.02 | 0.03 | 0.02 | 0.02 | 0.02 |
| TRBC | 12 | 3  | 0.03 | 0.02 | 0.03 | 0.02 | 0.04 |
| TRBC | 12 | 4  | 0.03 | 0.03 | 0.01 | 0.02 | 0.02 |
| TRBC | 12 | 6  | 0.36 | 0.33 | 0.29 | 0.26 | 0.28 |
| TRBC | 12 | 8  | 0.03 | 0.02 | 0.01 | 0.02 | 0.02 |
| TRBC | 12 | 9  | 0.03 | 0.02 | 0.01 | 0.02 | 0.03 |
| TRBC | 12 | 10 | 0.02 | 0.05 | 0.02 | 0.06 | 0.04 |
| TRBC | 12 | 11 | 0.30 | 0.20 | 0.21 | 0.17 | 0.19 |
| TRBC | 12 | 14 | 0.30 | 0.18 | 0.19 | 0.16 | 0.16 |
| TRBC | 12 | 16 | 0.02 | 0.03 | 0.02 | 0.03 | 0.01 |
| TRBC | 12 | 17 | 0.03 | 0.07 | 0.05 | 0.02 | 0.05 |
| TRBC | 12 | 19 | 0.04 | 0.08 | 0.08 | 0.04 | 0.05 |
| TRBC | 13 | 1  | 0.05 | 0.07 | 0.02 | 0.07 | 0.07 |
| TRBC | 13 | 2  | 0.07 | 0.14 | 0.10 | 0.03 | 0.21 |
| TRBC | 13 | 5  | 0.05 | 0.04 | 0.08 | 0.03 | 0.03 |
| TRBC | 13 | 6  | 0.05 | 0.04 | 0.06 | 0.03 | 0.03 |
| TRBC | 13 | 9  | 0.00 | 0.04 | 0.02 | 0.00 | 0.03 |
| TRBC | 13 | 11 | 0.02 | 0.00 | 0.06 | 0.07 | 0.00 |
| TRBC | 13 | 14 | 0.05 | 0.04 | 0.02 | 0.00 | 0.00 |
| TRBC | 13 | 16 | 0.08 | 0.00 | 0.09 | 0.04 | 0.00 |
| TRBC | 13 | 17 | 0.05 | 0.08 | 0.07 | 0.00 | 0.04 |
| TRBC | 14 | 1  | 0.09 | 0.03 | 0.10 | 0.11 | 0.18 |
| TRBC | 14 | 2  | 0.05 | 0.06 | 0.09 | 0.10 | 0.05 |
| TRBC | 14 | 5  | 0.00 | 0.00 | 0.08 | 0.03 | 0.04 |
| TRBC | 14 | 6  | 0.02 | 0.03 | 0.02 | 0.00 | 0.02 |
| TRBC | 14 | 8  | 0.00 | 0.07 | 0.04 | 0.00 | 0.00 |
| TRBC | 14 | 9  | 0.00 | 0.01 | 0.06 | 0.00 | 0.03 |
| TRBC | 14 | 11 | 0.07 | 0.01 | 0.00 | 0.02 | 0.09 |
| TRBC | 14 | 14 | 0.00 | 0.00 | 0.02 | 0.02 | 0.00 |
| TRBC | 14 | 16 | 0.02 | 0.03 | 0.04 | 0.04 | 0.02 |
| TRBC | 14 | 17 | 0.00 | 0.09 | 0.03 | 0.02 | 0.02 |
| TRBC | 15 | 17 | 0.06 | 0.09 | 0.04 | 0.00 | 0.03 |
| TRBC | 15 | 16 | 0.00 | 0.02 | 0.05 | 0.00 | 0.03 |

|      |    |    |      |      |      |      |      |
|------|----|----|------|------|------|------|------|
| TRBC | 15 | 14 | 0.00 | 0.05 | 0.02 | 0.00 | 0.00 |
| TRBC | 15 | 11 | 0.09 | 0.03 | 0.00 | 0.00 | 0.00 |
| TRBC | 15 | 9  | 0.03 | 0.06 | 0.09 | 0.00 | 0.00 |
| TRBC | 15 | 7  | 0.13 | 0.10 | 0.16 | 0.00 | 0.00 |
| TRBC | 15 | 6  | 0.03 | 0.04 | 0.14 | 0.00 | 0.10 |
| TRBC | 15 | 5  | 0.00 | 0.05 | 0.09 | 0.00 | 0.10 |
| TRBC | 15 | 3  | 0.09 | 0.08 | 0.04 | 0.00 | 0.00 |
| TRBC | 15 | 2  | 0.09 | 0.01 | 0.11 | 0.00 | 0.10 |
| TRBC | 16 | 19 | 0.00 | 0.00 | 0.00 | 0.00 | 0.00 |
| TRBC | 16 | 17 | 0.00 | 0.29 | 0.08 | 0.00 | 0.00 |
| TRBC | 16 | 16 | 0.00 | 0.00 | 0.00 | 0.10 | 0.00 |
| TRBC | 16 | 14 | 0.00 | 0.00 | 0.00 | 0.00 | 0.00 |
| TRBC | 16 | 11 | 0.24 | 0.00 | 0.00 | 0.05 | 0.07 |
| TRBC | 16 | 6  | 0.00 | 0.00 | 0.15 | 0.05 | 0.07 |
| TRBC | 16 | 3  | 0.00 | 0.00 | 0.00 | 0.00 | 0.00 |
| TRBC | 16 | 2  | 0.00 | 0.00 | 0.00 | 0.05 | 0.00 |
| TRBC | 17 | 3  | 0.00 | 0.04 | 0.00 | 0.00 | 0.03 |
| TRBC | 17 | 5  | 0.03 | 0.00 | 0.02 | 0.00 | 0.02 |
| TRBC | 17 | 6  | 0.00 | 0.02 | 0.00 | 0.00 | 0.10 |
| TRBC | 17 | 9  | 0.03 | 0.06 | 0.00 | 0.03 | 0.02 |
| TRBC | 17 | 11 | 0.01 | 0.02 | 0.00 | 0.00 | 0.00 |
| TRBC | 17 | 14 | 0.08 | 0.00 | 0.07 | 0.05 | 0.03 |
| TRBC | 17 | 16 | 0.04 | 0.13 | 0.05 | 0.00 | 0.00 |
| TRBC | 17 | 17 | 0.07 | 0.00 | 0.02 | 0.00 | 0.02 |
| TRBC | 17 | 19 | 0.01 | 0.02 | 0.02 | 0.00 | 0.00 |
| TRBC | 18 | 19 | 0.37 | 0.47 | 0.82 | 0.50 | 0.63 |
| TRBC | 18 | 17 | 0.11 | 0.10 | 0.13 | 0.08 | 0.11 |
| TRBC | 18 | 16 | 0.04 | 0.07 | 0.06 | 0.00 | 0.07 |
| TRBC | 18 | 14 | 0.00 | 0.09 | 0.12 | 0.08 | 0.03 |
| TRBC | 18 | 11 | 0.13 | 0.12 | 0.17 | 0.11 | 0.12 |
| TRBC | 18 | 6  | 0.13 | 0.12 | 0.11 | 0.11 | 0.12 |
| TRBC | 18 | 4  | 0.03 | 0.14 | 0.09 | 0.18 | 0.05 |
| TRBC | 18 | 3  | 0.08 | 0.14 | 0.05 | 0.07 | 0.05 |
| TRBC | 18 | 1  | 0.03 | 0.07 | 0.08 | 0.07 | 0.03 |
| TRBC | 19 | 1  | 0.00 | 0.00 | 0.00 | 0.00 | 0.00 |
| TRBC | 19 | 2  | 0.00 | 0.00 | 0.00 | 0.00 | 0.00 |
| TRBC | 19 | 3  | 0.00 | 0.79 | 0.00 | 0.00 | 0.00 |
| TRBC | 19 | 5  | 0.00 | 0.00 | 0.00 | 0.00 | 0.00 |
| TRBC | 19 | 6  | 0.00 | 0.00 | 0.00 | 0.00 | 0.00 |
| TRBC | 19 | 7  | 0.00 | 0.84 | 0.00 | 0.00 | 0.00 |
| TRBC | 19 | 9  | 0.00 | 0.00 | 0.00 | 0.00 | 0.00 |
| TRBC | 19 | 11 | 0.00 | 0.00 | 0.00 | 0.00 | 0.00 |
| TRBC | 19 | 14 | 0.00 | 0.00 | 0.00 | 0.00 | 0.00 |
| TRBC | 19 | 16 | 0.00 | 0.00 | 0.00 | 0.00 | 0.00 |
| TRBC | 19 | 17 | 0.00 | 0.89 | 0.00 | 0.00 | 0.00 |
| TRBC | 19 | 19 | 0.00 | 0.00 | 0.00 | 0.00 | 0.00 |
| TRBC | 20 | 3  | 0.01 | 0.02 | 0.01 | 0.02 | 0.01 |

|      |    |    |      |      |      |      |      |
|------|----|----|------|------|------|------|------|
| TRBC | 20 | 9  | 0.01 | 0.01 | 0.01 | 0.01 | 0.01 |
| TRBC | 20 | 11 | 0.01 | 0.01 | 0.03 | 0.02 | 0.02 |
| TRBC | 20 | 14 | 0.01 | 0.01 | 0.01 | 0.01 | 0.01 |
| TRBC | 20 | 16 | 0.03 | 0.02 | 0.02 | 0.02 | 0.02 |
| TRBC | 20 | 17 | 0.02 | 0.03 | 0.02 | 0.03 | 0.03 |
| TRBC | 20 | 19 | 0.02 | 0.01 | 0.01 | 0.01 | 0.02 |

B)

| Gene | OT | C position | % base conversion C>T |         |         |         |         |
|------|----|------------|-----------------------|---------|---------|---------|---------|
|      |    |            | UTD                   | 3CAR BE | 7CAR BE | 3CAR SP | 7CAR SP |
| CD7  | 1  | 16         | 0.00                  | 0.41    | 0.00    | 0.00    | 0.17    |
| CD7  | 1  | 13         | 0.00                  | 0.01    | 0.00    | 0.11    | 0.00    |
| CD7  | 1  | 12         | 0.00                  | 0.03    | 0.10    | 0.00    | 0.11    |
| CD7  | 1  | 8          | 0.00                  | 4.28    | 4.44    | 0.12    | 0.01    |
| CD7  | 1  | 7          | 0.00                  | 4.37    | 2.62    | 0.00    | 0.03    |
| CD7  | 1  | 4          | 0.00                  | 6.84    | 7.63    | 0.00    | 0.03    |
| CD7  | 1  | 3          | 0.16                  | 8.48    | 10.06   | 0.11    | 0.02    |
| CD7  | 1  | 1          | 0.00                  | 2.60    | 3.49    | 0.00    | 0.00    |
| CD7  | 2  | 1          | 1.53                  | 0.00    | 0.38    | 0.00    | 0.92    |
| CD7  | 2  | 3          | 0.81                  | 0.00    | 0.20    | 0.00    | 0.61    |
| CD7  | 2  | 4          | 1.61                  | 0.00    | 0.00    | 0.00    | 1.41    |
| CD7  | 2  | 7          | 0.26                  | 0.00    | 0.10    | 0.11    | 0.40    |
| CD7  | 2  | 12         | 0.03                  | 0.00    | 0.20    | 0.38    | 0.03    |
| CD7  | 2  | 13         | 0.00                  | 0.00    | 0.39    | 0.11    | 0.00    |
| CD7  | 2  | 16         | 0.05                  | 0.00    | 0.80    | 0.78    | 0.09    |
| CD7  | 2  | 18         | 0.00                  | 0.14    | 0.39    | 0.66    | 0.00    |
| CD7  | 3  | 18         | 0.00                  | 0.00    | 0.00    | 0.04    | 0.00    |
| CD7  | 3  | 16         | 0.00                  | 0.00    | 0.00    | 0.08    | 0.09    |
| CD7  | 3  | 13         | 0.00                  | 0.00    | 0.00    | 0.00    | 0.30    |
| CD7  | 3  | 12         | 0.00                  | 0.00    | 0.00    | 0.00    | 0.10    |
| CD7  | 3  | 8          | 0.21                  | 0.00    | 0.09    | 0.05    | 0.11    |
| CD7  | 3  | 7          | 0.21                  | 1.96    | 0.00    | 0.00    | 0.33    |
| CD7  | 3  | 4          | 0.11                  | 0.00    | 0.00    | 0.10    | 0.00    |
| CD7  | 3  | 3          | 0.00                  | 0.00    | 0.10    | 0.05    | 0.23    |
| CD7  | 3  | 2          | 0.00                  | 0.00    | 0.00    | 0.05    | 0.11    |
| CD7  | 3  | 1          | 0.00                  | 0.00    | 0.00    | 0.00    | 0.00    |
| CD7  | 4  | 18         | 0.00                  | 0.04    | 0.00    | 0.18    | 0.00    |
| CD7  | 4  | 16         | 0.00                  | 0.00    | 0.03    | 0.00    | 0.00    |
| CD7  | 4  | 13         | 0.00                  | 0.00    | 0.06    | 0.00    | 0.12    |
| CD7  | 4  | 12         | 0.00                  | 0.00    | 0.03    | 0.00    | 0.00    |
| CD7  | 4  | 8          | 0.00                  | 0.00    | 0.03    | 0.07    | 0.05    |
| CD7  | 4  | 7          | 0.00                  | 0.11    | 0.00    | 0.07    | 0.14    |
| CD7  | 4  | 4          | 0.00                  | 0.00    | 0.00    | 0.00    | 0.00    |
| CD7  | 4  | 3          | 0.00                  | 0.05    | 0.00    | 0.00    | 0.00    |
| CD7  | 4  | 2          | 0.00                  | 0.05    | 0.00    | 0.08    | 0.05    |
| CD7  | 4  | 1          | 0.00                  | 0.00    | 0.00    | 0.00    | 0.10    |



|     |    |    |      |      |      |      |      |
|-----|----|----|------|------|------|------|------|
| CD7 | 5  | 18 | 0.00 | 0.09 | 0.00 | 0.00 | 0.07 |
| CD7 | 5  | 16 | 0.00 | 0.00 | 0.00 | 0.00 | 0.00 |
| CD7 | 5  | 13 | 0.00 | 0.00 | 0.00 | 0.00 | 0.00 |
| CD7 | 5  | 8  | 0.14 | 0.00 | 0.08 | 0.00 | 0.00 |
| CD7 | 5  | 7  | 0.00 | 0.08 | 0.00 | 0.00 | 0.00 |
| CD7 | 5  | 4  | 0.00 | 0.00 | 0.00 | 0.00 | 0.00 |
| CD7 | 5  | 3  | 0.00 | 0.00 | 0.00 | 0.00 | 0.00 |
| CD7 | 5  | 1  | 0.00 | 0.00 | 0.00 | 0.00 | 0.00 |
| CD7 | 6  | 1  | 0.02 | 0.04 | 0.05 | 0.00 | 0.06 |
| CD7 | 6  | 3  | 0.04 | 0.09 | 0.01 | 0.06 | 0.01 |
| CD7 | 6  | 4  | 0.01 | 0.00 | 0.09 | 0.10 | 0.04 |
| CD7 | 6  | 7  | 0.00 | 0.02 | 0.01 | 0.00 | 0.01 |
| CD7 | 6  | 12 | 0.03 | 0.01 | 0.04 | 0.02 | 0.02 |
| CD7 | 6  | 13 | 0.04 | 0.00 | 0.01 | 0.02 | 0.01 |
| CD7 | 6  | 16 | 0.05 | 0.01 | 0.01 | 0.02 | 0.01 |
| CD7 | 6  | 18 | 0.04 | 0.02 | 0.07 | 0.04 | 0.07 |
| CD7 | 7  | 1  | 0.02 | 0.03 | 0.06 | 0.04 | 0.04 |
| CD7 | 7  | 4  | 0.07 | 0.09 | 0.06 | 0.05 | 0.04 |
| CD7 | 7  | 5  | 0.11 | 0.09 | 0.08 | 0.02 | 0.04 |
| CD7 | 7  | 7  | 0.04 | 1.88 | 1.63 | 0.02 | 0.04 |
| CD7 | 7  | 12 | 0.09 | 0.03 | 0.02 | 0.04 | 0.03 |
| CD7 | 7  | 13 | 0.00 | 0.04 | 0.05 | 0.05 | 0.05 |
| CD7 | 7  | 16 | 0.02 | 0.07 | 0.06 | 0.03 | 0.04 |
| CD7 | 7  | 18 | 0.15 | 0.09 | 0.06 | 0.05 | 0.07 |
| CD7 | 8  | 1  | 0.02 | 0.04 | 0.03 | 0.01 | 0.04 |
| CD7 | 8  | 4  | 0.05 | 0.03 | 0.04 | 0.02 | 0.04 |
| CD7 | 8  | 7  | 0.04 | 0.03 | 0.03 | 0.01 | 0.02 |
| CD7 | 8  | 8  | 0.14 | 0.06 | 0.07 | 0.06 | 0.12 |
| CD7 | 8  | 12 | 0.03 | 0.01 | 0.03 | 0.02 | 0.04 |
| CD7 | 8  | 13 | 0.03 | 0.03 | 0.04 | 0.05 | 0.04 |
| CD7 | 8  | 16 | 0.05 | 0.04 | 0.04 | 0.04 | 0.07 |
| CD7 | 8  | 18 | 0.01 | 0.01 | 0.02 | 0.01 | 0.02 |
| CD7 | 9  | 18 | 0.01 | 0.01 | 0.02 | 0.02 | 0.02 |
| CD7 | 9  | 16 | 0.02 | 0.02 | 0.02 | 0.01 | 0.03 |
| CD7 | 9  | 13 | 0.03 | 0.05 | 0.04 | 0.03 | 0.04 |
| CD7 | 9  | 12 | 0.04 | 0.01 | 0.02 | 0.02 | 0.02 |
| CD7 | 9  | 7  | 0.04 | 0.08 | 0.07 | 0.04 | 0.05 |
| CD7 | 9  | 4  | 0.03 | 0.02 | 0.04 | 0.03 | 0.01 |
| CD7 | 9  | 3  | 0.03 | 0.03 | 0.04 | 0.03 | 0.03 |
| CD7 | 9  | 2  | 0.02 | 0.03 | 0.03 | 0.04 | 0.03 |
| CD7 | 10 | 1  | 0.03 | 0.03 | 0.02 | 0.03 | 0.07 |
| CD7 | 10 | 3  | 0.02 | 0.02 | 0.05 | 0.02 | 0.03 |
| CD7 | 10 | 4  | 0.02 | 0.01 | 0.07 | 0.02 | 0.03 |
| CD7 | 10 | 7  | 0.04 | 0.02 | 0.11 | 0.04 | 0.04 |
| CD7 | 10 | 8  | 0.05 | 0.06 | 0.09 | 0.03 | 0.08 |
| CD7 | 10 | 12 | 0.04 | 0.02 | 0.04 | 0.04 | 0.04 |
| CD7 | 10 | 13 | 0.04 | 0.03 | 0.08 | 0.03 | 0.04 |

|     |    |    |      |      |      |      |      |
|-----|----|----|------|------|------|------|------|
| CD7 | 10 | 16 | 0.04 | 0.02 | 0.04 | 0.02 | 0.01 |
| CD7 | 10 | 18 | 0.03 | 0.02 | 0.01 | 0.03 | 0.02 |
| CD7 | 11 | 18 | 0.07 | 0.00 | 0.12 | 0.00 | 0.00 |
| CD7 | 11 | 16 | 0.07 | 0.00 | 0.00 | 0.12 | 0.00 |
| CD7 | 11 | 13 | 0.07 | 0.11 | 0.00 | 0.00 | 0.07 |
| CD7 | 11 | 12 | 0.07 | 0.00 | 0.00 | 0.00 | 0.07 |
| CD7 | 11 | 11 | 0.07 | 0.11 | 0.00 | 0.18 | 0.00 |
| CD7 | 11 | 8  | 0.07 | 0.11 | 0.23 | 0.00 | 0.00 |
| CD7 | 11 | 7  | 0.00 | 0.22 | 0.47 | 0.00 | 0.00 |
| CD7 | 11 | 4  | 0.00 | 0.11 | 0.12 | 0.06 | 0.07 |
| CD7 | 11 | 1  | 0.07 | 0.06 | 0.06 | 0.00 | 0.00 |
| CD7 | 12 | 1  | 0.00 | 0.02 | 0.02 | 0.00 | 0.03 |
| CD7 | 12 | 3  | 0.05 | 0.02 | 0.07 | 0.04 | 0.04 |
| CD7 | 12 | 4  | 0.00 | 0.01 | 0.03 | 0.00 | 0.03 |
| CD7 | 12 | 7  | 0.00 | 0.03 | 0.04 | 0.03 | 0.01 |
| CD7 | 12 | 8  | 0.15 | 0.06 | 0.09 | 0.07 | 0.02 |
| CD7 | 12 | 11 | 0.00 | 0.03 | 0.07 | 0.00 | 0.03 |
| CD7 | 12 | 12 | 0.05 | 0.04 | 0.08 | 0.00 | 0.04 |
| CD7 | 12 | 13 | 0.05 | 0.03 | 0.04 | 0.03 | 0.02 |
| CD7 | 12 | 16 | 0.00 | 0.03 | 0.04 | 0.03 | 0.02 |
| CD7 | 12 | 18 | 0.05 | 0.05 | 0.12 | 0.10 | 0.06 |
| CD7 | 13 | 1  | 0.03 | 0.09 | 0.04 | 0.03 | 0.03 |
| CD7 | 13 | 3  | 0.05 | 0.05 | 0.04 | 0.03 | 0.03 |
| CD7 | 13 | 4  | 0.02 | 0.00 | 0.06 | 0.04 | 0.07 |
| CD7 | 13 | 8  | 0.03 | 0.00 | 0.05 | 0.04 | 0.06 |
| CD7 | 13 | 12 | 0.05 | 0.05 | 0.06 | 0.04 | 0.07 |
| CD7 | 13 | 13 | 0.01 | 0.05 | 0.07 | 0.03 | 0.03 |
| CD7 | 13 | 16 | 0.07 | 0.00 | 0.08 | 0.07 | 0.08 |
| CD7 | 13 | 18 | 0.05 | 0.00 | 0.05 | 0.05 | 0.07 |
| CD7 | 14 | 1  | 0.04 | 0.02 | 0.05 | 0.07 | 0.04 |
| CD7 | 14 | 2  | 0.07 | 0.06 | 0.04 | 0.05 | 0.05 |
| CD7 | 14 | 4  | 0.01 | 0.00 | 0.01 | 0.01 | 0.05 |
| CD7 | 14 | 7  | 0.03 | 0.04 | 0.03 | 0.04 | 0.04 |
| CD7 | 14 | 8  | 0.02 | 0.04 | 0.04 | 0.08 | 0.04 |
| CD7 | 14 | 13 | 0.04 | 0.02 | 0.03 | 0.04 | 0.03 |
| CD7 | 14 | 16 | 0.02 | 0.00 | 0.04 | 0.01 | 0.03 |
| CD7 | 14 | 18 | 0.04 | 0.02 | 0.04 | 0.03 | 0.04 |
| CD7 | 15 | 18 | 0.34 | 0.08 | 0.37 | 0.38 | 0.33 |
| CD7 | 15 | 16 | 0.42 | 0.24 | 0.48 | 0.29 | 0.34 |
| CD7 | 15 | 13 | 0.19 | 0.00 | 0.33 | 0.33 | 0.18 |
| CD7 | 15 | 12 | 0.19 | 0.33 | 0.08 | 0.21 | 0.13 |
| CD7 | 15 | 8  | 0.35 | 0.09 | 0.34 | 0.37 | 0.24 |
| CD7 | 15 | 4  | 0.12 | 0.00 | 0.10 | 0.15 | 0.08 |
| CD7 | 15 | 3  | 0.23 | 0.17 | 0.26 | 0.18 | 0.13 |
| CD7 | 16 | 3  | 0.00 | 0.00 | 0.00 | 0.00 | 0.00 |
| CD7 | 16 | 4  | 0.36 | 0.00 | 0.31 | 0.00 | 0.00 |
| CD7 | 16 | 8  | 0.68 | 0.00 | 0.00 | 0.00 | 0.00 |

|     |    |    |      |      |      |      |      |
|-----|----|----|------|------|------|------|------|
| CD7 | 16 | 12 | 0.00 | 0.00 | 0.00 | 0.00 | 0.00 |
| CD7 | 16 | 13 | 0.00 | 0.00 | 0.31 | 0.00 | 0.00 |
| CD7 | 16 | 16 | 0.00 | 0.00 | 0.00 | 0.00 | 0.00 |
| CD7 | 16 | 18 | 0.00 | 0.00 | 0.00 | 0.00 | 0.00 |
| CD7 | 17 | 1  | 0.06 | 0.06 | 0.00 | 0.00 | 0.11 |
| CD7 | 17 | 4  | 0.06 | 0.06 | 0.05 | 0.07 | 0.02 |
| CD7 | 17 | 5  | 0.00 | 0.06 | 0.11 | 0.00 | 0.02 |
| CD7 | 17 | 7  | 0.05 | 1.54 | 1.10 | 0.06 | 0.04 |
| CD7 | 17 | 8  | 0.00 | 1.03 | 0.71 | 0.13 | 0.06 |
| CD7 | 17 | 13 | 0.00 | 0.00 | 0.02 | 0.06 | 0.02 |
| CD7 | 17 | 16 | 0.11 | 0.06 | 0.10 | 0.07 | 0.10 |
| CD7 | 17 | 18 | 0.00 | 0.06 | 0.02 | 0.13 | 0.00 |
| CD7 | 18 | 16 | 0.05 | 0.15 | 0.03 | 0.07 | 0.09 |
| CD7 | 18 | 13 | 0.04 | 0.00 | 0.05 | 0.01 | 0.03 |
| CD7 | 18 | 12 | 0.02 | 0.02 | 0.00 | 0.03 | 0.01 |
| CD7 | 18 | 11 | 0.04 | 0.11 | 0.06 | 0.05 | 0.02 |
| CD7 | 18 | 8  | 0.02 | 0.11 | 0.01 | 0.00 | 0.04 |
| CD7 | 18 | 7  | 0.05 | 0.04 | 0.04 | 0.05 | 0.10 |
| CD7 | 18 | 4  | 0.06 | 0.02 | 0.01 | 0.02 | 0.02 |
| CD7 | 18 | 3  | 0.11 | 0.02 | 0.06 | 0.07 | 0.04 |
| CD7 | 18 | 1  | 0.04 | 0.08 | 0.03 | 0.04 | 0.05 |
| CD7 | 19 | 2  | 0.03 | 0.01 | 0.03 | 0.02 | 0.04 |
| CD7 | 19 | 3  | 0.01 | 0.00 | 0.03 | 0.01 | 0.03 |
| CD7 | 19 | 4  | 0.02 | 0.03 | 0.00 | 0.02 | 0.05 |
| CD7 | 19 | 7  | 0.04 | 0.05 | 0.03 | 0.03 | 0.01 |
| CD7 | 19 | 8  | 0.01 | 0.06 | 0.00 | 0.01 | 0.03 |
| CD7 | 19 | 12 | 0.05 | 0.06 | 0.02 | 0.06 | 0.03 |
| CD7 | 19 | 13 | 0.04 | 0.08 | 0.01 | 0.03 | 0.03 |
| CD7 | 19 | 16 | 0.01 | 0.02 | 0.03 | 0.02 | 0.06 |
| CD7 | 19 | 18 | 0.01 | 0.05 | 0.01 | 0.02 | 0.02 |
| CD7 | 20 | 2  | 0.06 | 0.30 | 0.37 | 0.05 | 0.07 |
| CD7 | 20 | 3  | 0.05 | 0.19 | 0.19 | 0.04 | 0.04 |
| CD7 | 20 | 4  | 0.07 | 0.46 | 0.41 | 0.06 | 0.05 |
| CD7 | 20 | 6  | 0.04 | 3.15 | 4.08 | 0.03 | 0.04 |
| CD7 | 20 | 7  | 0.02 | 2.96 | 3.77 | 0.02 | 0.04 |
| CD7 | 20 | 8  | 0.03 | 2.71 | 3.67 | 0.02 | 0.03 |
| CD7 | 20 | 12 | 0.03 | 0.04 | 0.03 | 0.05 | 0.05 |
| CD7 | 20 | 13 | 0.03 | 0.03 | 0.05 | 0.02 | 0.05 |
| CD7 | 20 | 16 | 0.03 | 0.10 | 0.19 | 0.03 | 0.04 |
| CD7 | 20 | 18 | 0.05 | 0.04 | 0.05 | 0.05 | 0.04 |

## Supplementary Table 3

| <b>Translocation Number</b> | <b>Probe Sequence</b>      |
|-----------------------------|----------------------------|
| 1, 2                        | ACAACCTGACTATCACCATGCACCGC |
| 3                           | TACGGCTCCGGCACCCCTGGT      |
| 4                           | CTGCCAGGCCATCACGGAGGTCAAT  |
| albumin                     | CCTGTCATGCCACACAAATCTCTCC  |
| <b>Translocation Number</b> | <b>Primer Sequence</b>     |
| 1 Fwd                       | AGGTCGCTGTGTTTGAGC         |
| 1 Rev                       | AGGTCGCTGTGTTTGAGC         |
| 2 Fwd                       | ACTACGGACAGACGGTTC         |
| 2 Rev                       | TATCTGGAGTCATTGAGGGC       |
| 3 Fwd                       | ATCTGGAGTCATTGAGGGCG       |
| 3 Rev                       | TGGGCACATTCCCTACCT         |
| 4 Fwd                       | AGGTCGCTGTGTTTGAGC         |
| 4 Rev                       | AGGTCGCTGTGTTTGAGC         |
| Albumin Fwd                 | GCTGCTATCTTGTGGGCTGT       |
| Albumin Rev                 | ACTCATGGGAGCTGCTGGTTC      |

Primer and probe sets for translocation detection using ddPCR.

**Supplementary Table S4.** Primer sequences for **A) TRBC** and **B) CD7** off-targets. Primers are given in the 5'-3' orientation. Fwd: forward, Rev: reverse.

A)

| Gene Target | Notes      | Sequence                |
|-------------|------------|-------------------------|
| TRBC-01     | Fwd primer | GAGGCAGGTCTTTCACATTCA   |
| TRBC-01     | Rev primer | CAAAACGGAAGGAGGCATGT    |
| TRBC-02     | Fwd primer | AATCTTCACAGCCCCTCCTC    |
| TRBC-02     | Rev primer | AGTGCGGCCTCAGGTAGC      |
| TRBC-03     | Fwd primer | GAGAGTGAACGAGGGTGTGG    |
| TRBC-03     | Rev primer | CCACCTTCACCCCTCGAG      |
| TRBC-04     | Fwd primer | GTGGTAAGTGTGAGCATTGCAG  |
| TRBC-04     | Rev primer | TCAGTCCATACTTTCCCCGC    |
| TRBC-05     | Fwd primer | GATACCTGCTGTCCCCTCTC    |
| TRBC-05     | Rev primer | CAGAGGTAGATTGCTATGGACCT |
| TRBC-06     | Fwd primer | CTTATCCCAGCAGCACTTGG    |
| TRBC-06     | Rev primer | TCTCTTCTCCCAACACC       |
| TRBC-07     | Fwd primer | AAAATATGGCCATGCATTTT    |
| TRBC-07     | Rev primer | AAAGACACATTCATTTTCCC    |
| TRBC-08     | Fwd primer | AGAAAGTTGCTCAATCAATG    |
| TRBC-08     | Rev primer | TAGAGGGAGAAAGAAACAAC    |
| TRBC-09     | Fwd primer | TCTATGCGAGTTTATCTGTC    |
| TRBC-09     | Rev primer | CAGCAGGGATCTAAAGAG      |
| TRBC-10     | Fwd primer | TAGATGTTTGGCCTGTTTAA    |
| TRBC-10     | Rev primer | TGACTTTTGTGTTTACCC      |
| TRBC-11     | Fwd primer | AAAAGTTTACCTCTCACAA     |
| TRBC-11     | Rev primer | ACAAATTCACATGGCTTTC     |
| TRBC-12     | Fwd primer | CTCTCAAATCCTAGACCT      |
| TRBC-12     | Rev primer | CTCCTTTTGCAGAGTTTG      |
| TRBC-13     | Fwd primer | CCTAGTGCATCCTGGAA       |
| TRBC-13     | Rev primer | CTCCATTTTCTCTGCTG       |
| TRBC-14     | Fwd primer | CACTTTACTGTAGCCTGG      |
| TRBC-14     | Rev primer | TGTGGAGATTGTAACTAGG     |
| TRBC-15     | Fwd primer | CACACCATTCTCATCTTCTA    |
| TRBC-15     | Rev primer | AAAGAAGACAAACAACCCA     |
| TRBC-16     | Fwd primer | TTTGCAGATGAGGACCTG      |
| TRBC-16     | Rev primer | CAAGGTA CTACCGTGTA      |
| TRBC-17     | Fwd primer | CTGTTTGTGTCATGGA        |
| TRBC-17     | Rev primer | GTCAAAAGACATGGCAAATA    |
| TRBC-18     | Fwd primer | GGTCCCTGATTCTTTAAG      |
| TRBC-18     | Rev primer | AGACACACACATATAGAC      |
| TRBC-19     | Fwd primer | GTGTTTCTGTGGTTTCAAG     |
| TRBC-19     | Rev primer | GTCTGCTTTGCTGTCTGT      |
| TRBC-20     | Fwd primer | ATGTAGACTAGCTGAAGTTG    |
| TRBC-20     | Rev primer | GGATTTGGGGTACTCTAAAA    |

B)

| Gene Target | Primer     | Sequence               |
|-------------|------------|------------------------|
| CD7-01      | Fwd primer | TGTCATGCTGAGTCCACTGT   |
| CD7-01      | Rev primer | GACATGTCTCCCCCTCCTGTG  |
| CD7-02      | Fwd primer | CAATAGCCACACACACCTGG   |
| CD7-02      | Rev primer | ACGCCAAGAGAAGTAAGCCT   |
| CD7-03      | Fwd primer | TCTCCTCTTTTCGCCTTGGT   |
| CD7-03      | Rev primer | GGGAAACTCGTGTACAAGGC   |
| CD7-04      | Fwd primer | TCTCCTCTTTTCGCCTTGGT   |
| CD7-04      | Rev primer | GGGAAACTCGTGTACAAGGC   |
| CD7-05      | Fwd primer | CATAGGCTCCCGAGGATTGA   |
| CD7-05      | Rev primer | GCGTGTGTGTGTGATCTCTG   |
| CD7-06      | Fwd primer | CAAATGCAGCAAGAACAGGAAC |
| CD7-06      | Rev primer | GTGGTTTTAGGGTGA CTGCG  |
| CD7-07      | Fwd primer | AATCCTACGTAAAGTACCAG   |
| CD7-07      | Rev primer | GCACACCTGAAAGTTCTAA    |
| CD7-08      | Fwd primer | GTGGTGGCTACTATTATCAT   |
| CD7-08      | Rev primer | CCATCATACTCTCTCATCAG   |
| CD7-09      | Fwd primer | CAATGAACACCAAAGATGA    |
| CD7-09      | Rev primer | ATGATCATTTCTGTGTAGCT   |
| CD7-10      | Fwd primer | GCAACCTAGTGTCAATATCT   |
| CD7-10      | Rev primer | CCTATCAGCACTTGTATTGA   |
| CD7-11      | Fwd primer | TTTAGTAGAGACGGGGTTT    |
| CD7-11      | Rev primer | TTGACTCTTCTGTGTGTTTT   |
| CD7-12      | Fwd primer | TACCTCTCTCAATTTCAAG    |
| CD7-12      | Rev primer | CTTTCAGGAGATTCTTTACG   |
| CD7-13      | Fwd primer | CTTGACTTTCAGAGAAGCTA   |
| CD7-13      | Rev primer | ACTCATGCCCCAGTTTAT     |
| CD7-14      | Fwd primer | TAAGTAACTGGGAAATTGCA   |
| CD7-14      | Rev primer | CACCTGTA ACTAAGCCAG    |
| CD7-15      | Fwd primer | AAGTACTACTGTT CAGG TTC |
| CD7-15      | Rev primer | GTAGAATCACTTGAACCCA    |
| CD7-16      | Fwd primer | TACAAATAGCTACAGGGAAG   |
| CD7-16      | Rev primer | CTGTAATCCAGCTACTTG     |
| CD7-17      | Fwd primer | GCTTTTGTATCCAAGTCTTT   |
| CD7-17      | Rev primer | AACTTACCTTCTGCCACT     |
| CD7-18      | Fwd primer | AGACCCTCACTATTCTGG     |
| CD7-18      | Rev primer | ATCCCAGCTTTTACAGTTTA   |
| CD7-19      | Fwd primer | TGTATACAAA ACTGGGTTCT  |
| CD7-19      | Rev primer | CTGGGTGAAGGACATTTTC    |
| CD7-20      | Fwd primer | TTGCAATTCACGAAATTTA    |
| CD7-20      | Rev primer | TCAAAAGCTTCCTAAGTCTT   |
